# Supplementary material for: Does diversity beget diversity in microbiomes?
Source: eLife journal article supplement (doi:10.7554/elife.58999), 2020-11-20
Supplement: supp [file elife-58999-supp-v1.zip]

Archive with 19 entries (19 files):
- elife_poa_e58999_Figure_2_figure_supplement_1.pdf
- elife_poa_e58999_Figure_2_figure_supplement_2.pdf
- elife_poa_e58999_Figure_2_figure_supplement_3.pdf
- elife_poa_e58999_Figure_2_figure_supplement_4.pdf
- elife_poa_e58999_Figure_2_figure_supplement_5.pdf
- elife_poa_e58999_Figure_2_figure_supplement_6.pdf
- elife_poa_e58999_Figure_2_figure_supplement_7.pdf
- elife_poa_e58999_Figure_2_figure_supplement_8.pdf
- elife_poa_e58999_Figure_2_figure_supplement_9.pdf
- elife_poa_e58999_Figure_2_figure_supplement_10.pdf
- elife_poa_e58999_Figure_2_figure_supplement_11.pdf
- elife_poa_e58999_Figure_4_figure_supplement_1.pdf
- elife_poa_e58999_Supplementary_file_1.pdf
- elife_poa_e58999_Supplementary_file_2.docx
- elife_poa_e58999_Supplementary_file_3.pdf
- elife_poa_e58999_Supplementary_file_4.pdf
- elife_poa_e58999_Supplementary_file_5.xlsx
- elife_poa_e58999_Supplementary_file_6.xlsx
- elife_poa_e58999_Transparent_Reporting_File.pdf
