# Supplementary material for: Does diversity beget diversity in microbiomes?
Source: eLife journal article supplement (doi:10.7554/elife.58999), 2020-11-20

# A. Proteobacteria

Number of Proteobacteria classes

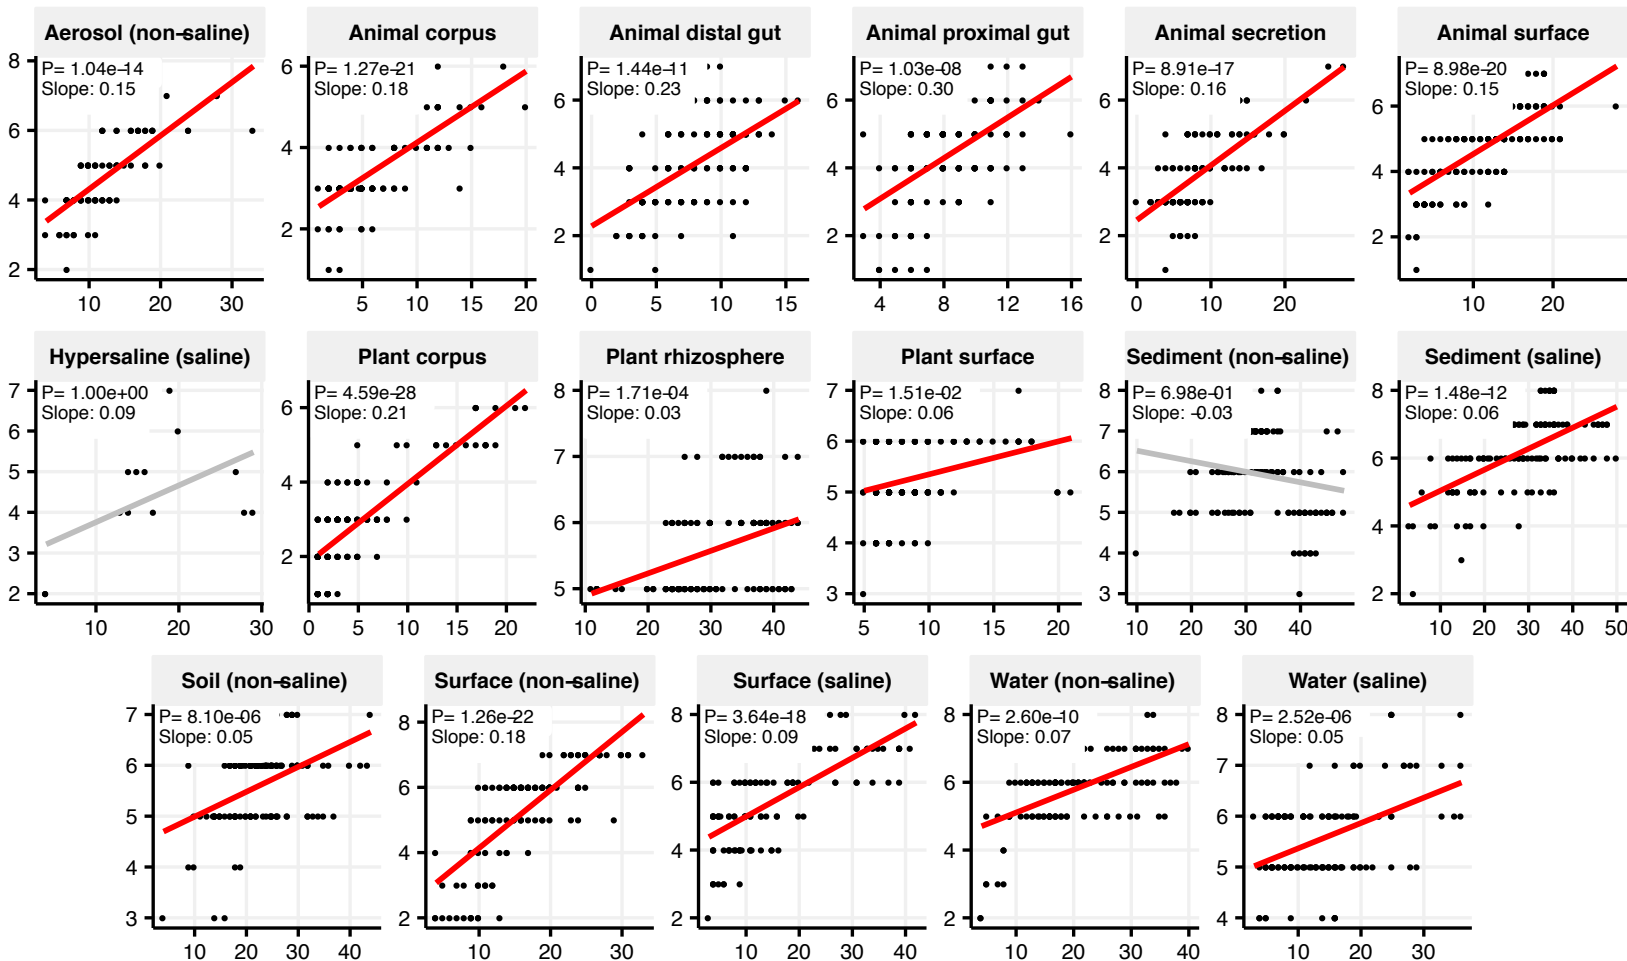

Number of non-Proteobacteria phyla

## B. Bacteroidetes

Number of Bacteroidetes classes

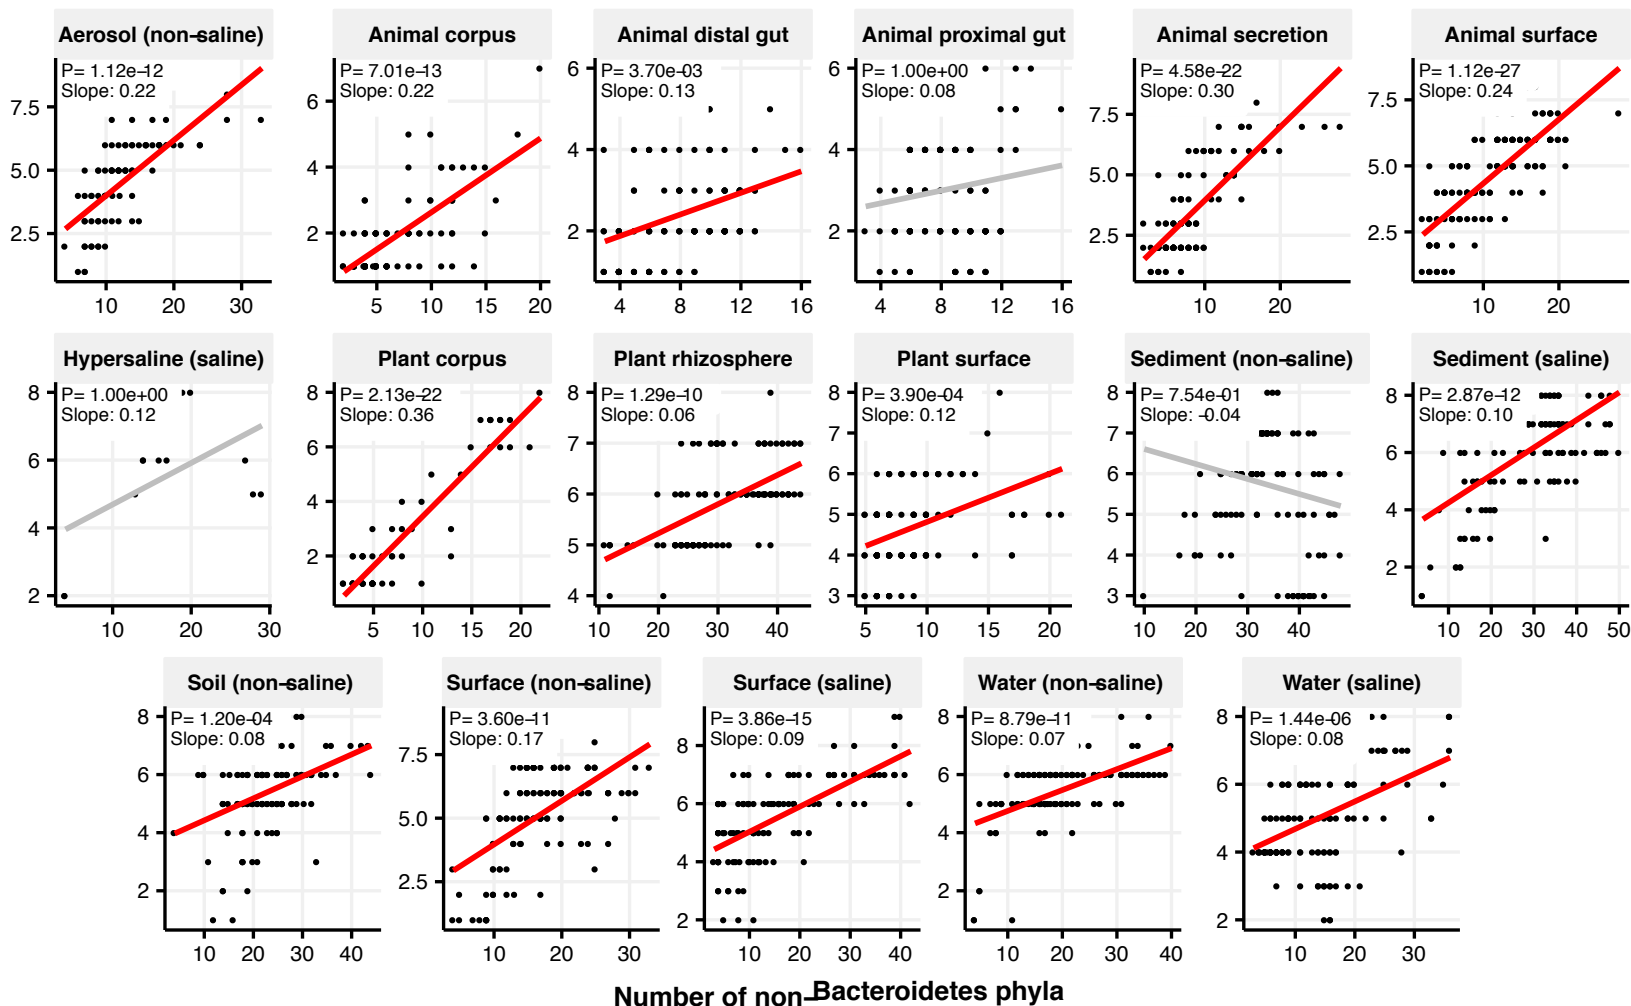

## C. Actinobacteria

Number of Actinobacteria classes

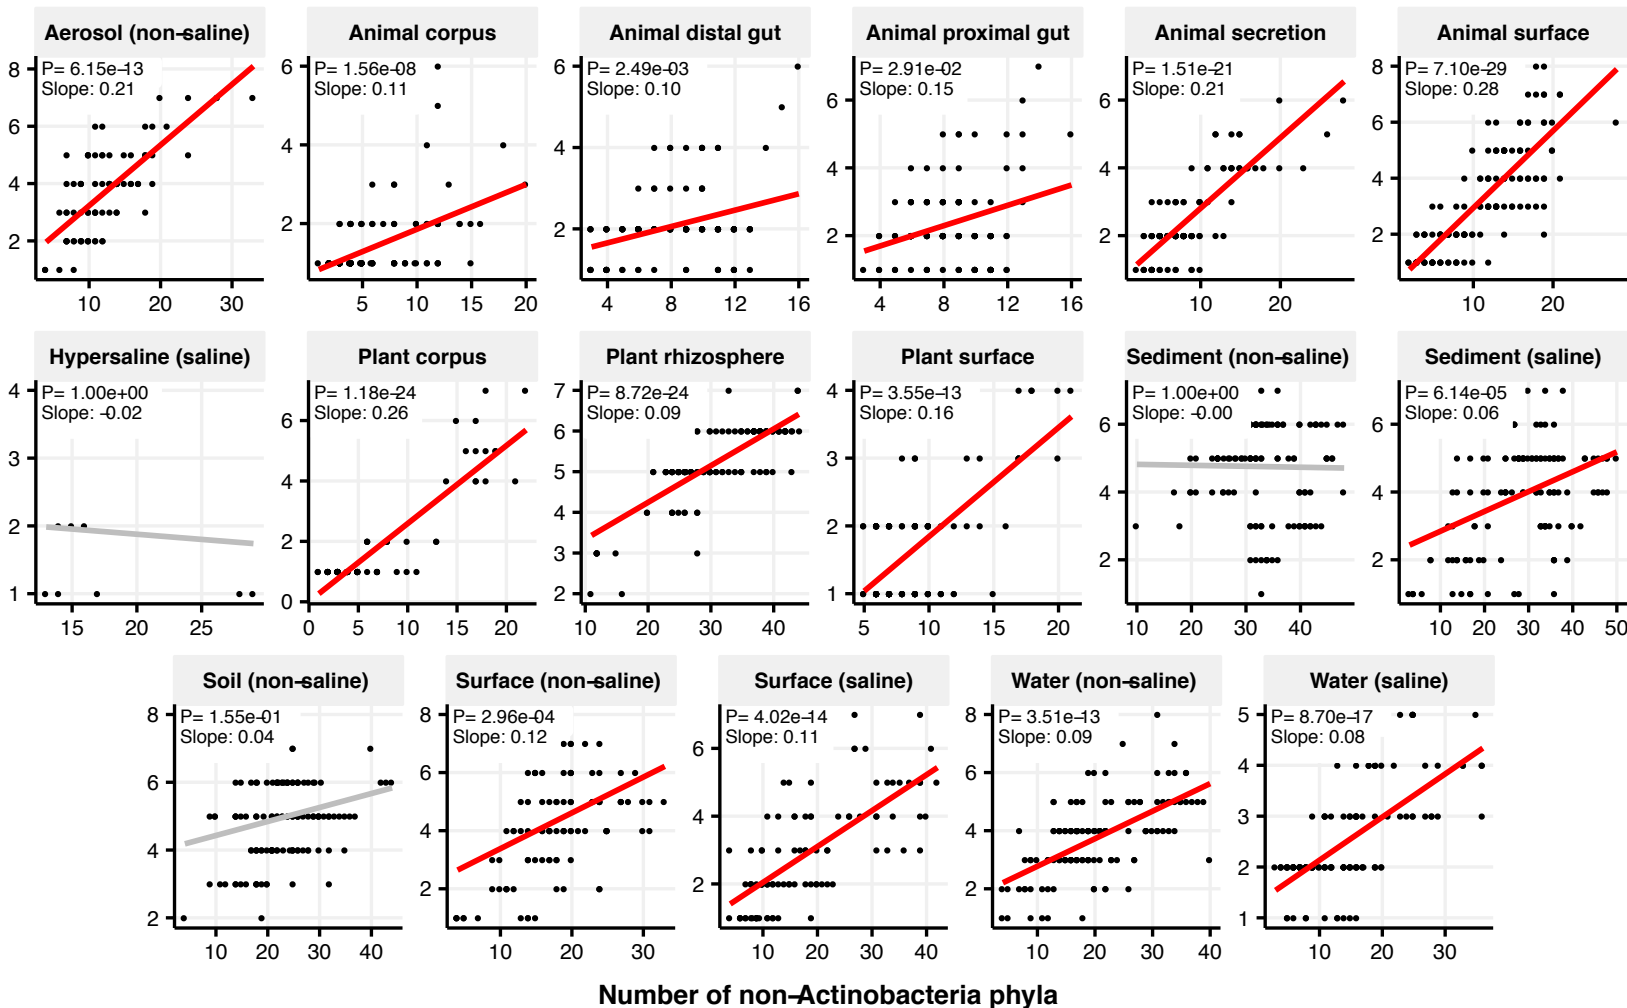

Supplement: supp [file elife-58999-supp-v1.zip › elife_poa_e58999_Figure_2_figure_supplement_2.pdf]
