# Supplementary material for: Does diversity beget diversity in microbiomes?
Source: eLife journal article supplement (doi:10.7554/elife.58999), 2020-11-20

# A. Gammaproteobacteria

Number of Gammaproteobacteria orders

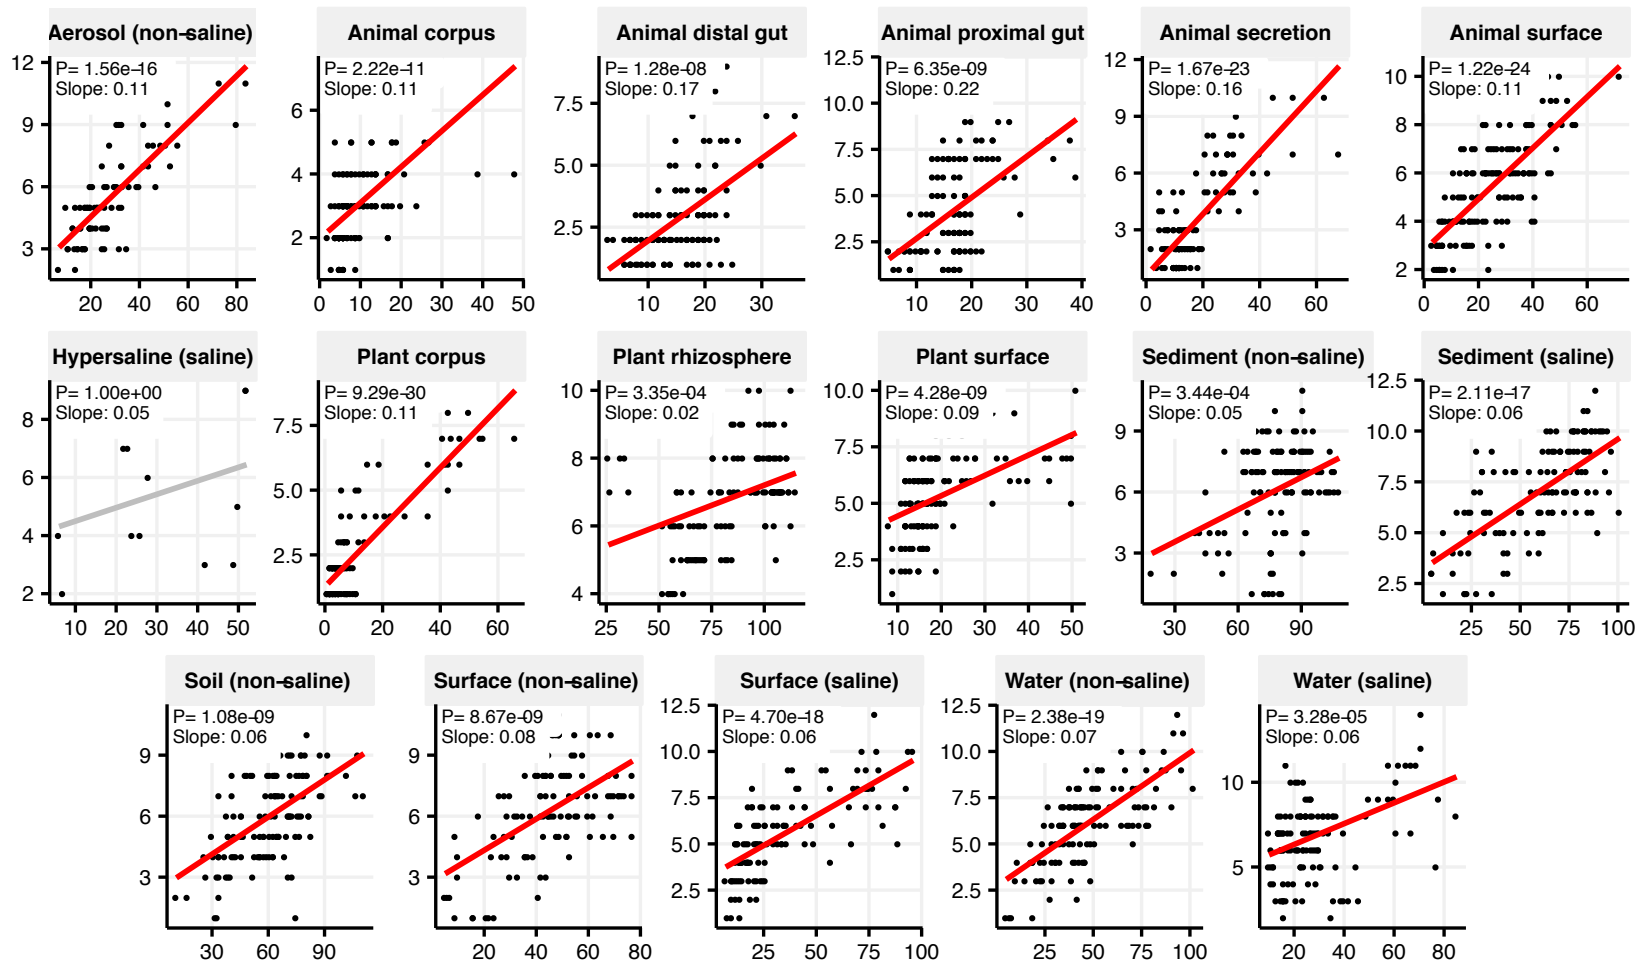

Number of non-Gammaproteobacteria classes

## B. Alphaproteobacteria

Number of Alphaproteobacteria orders

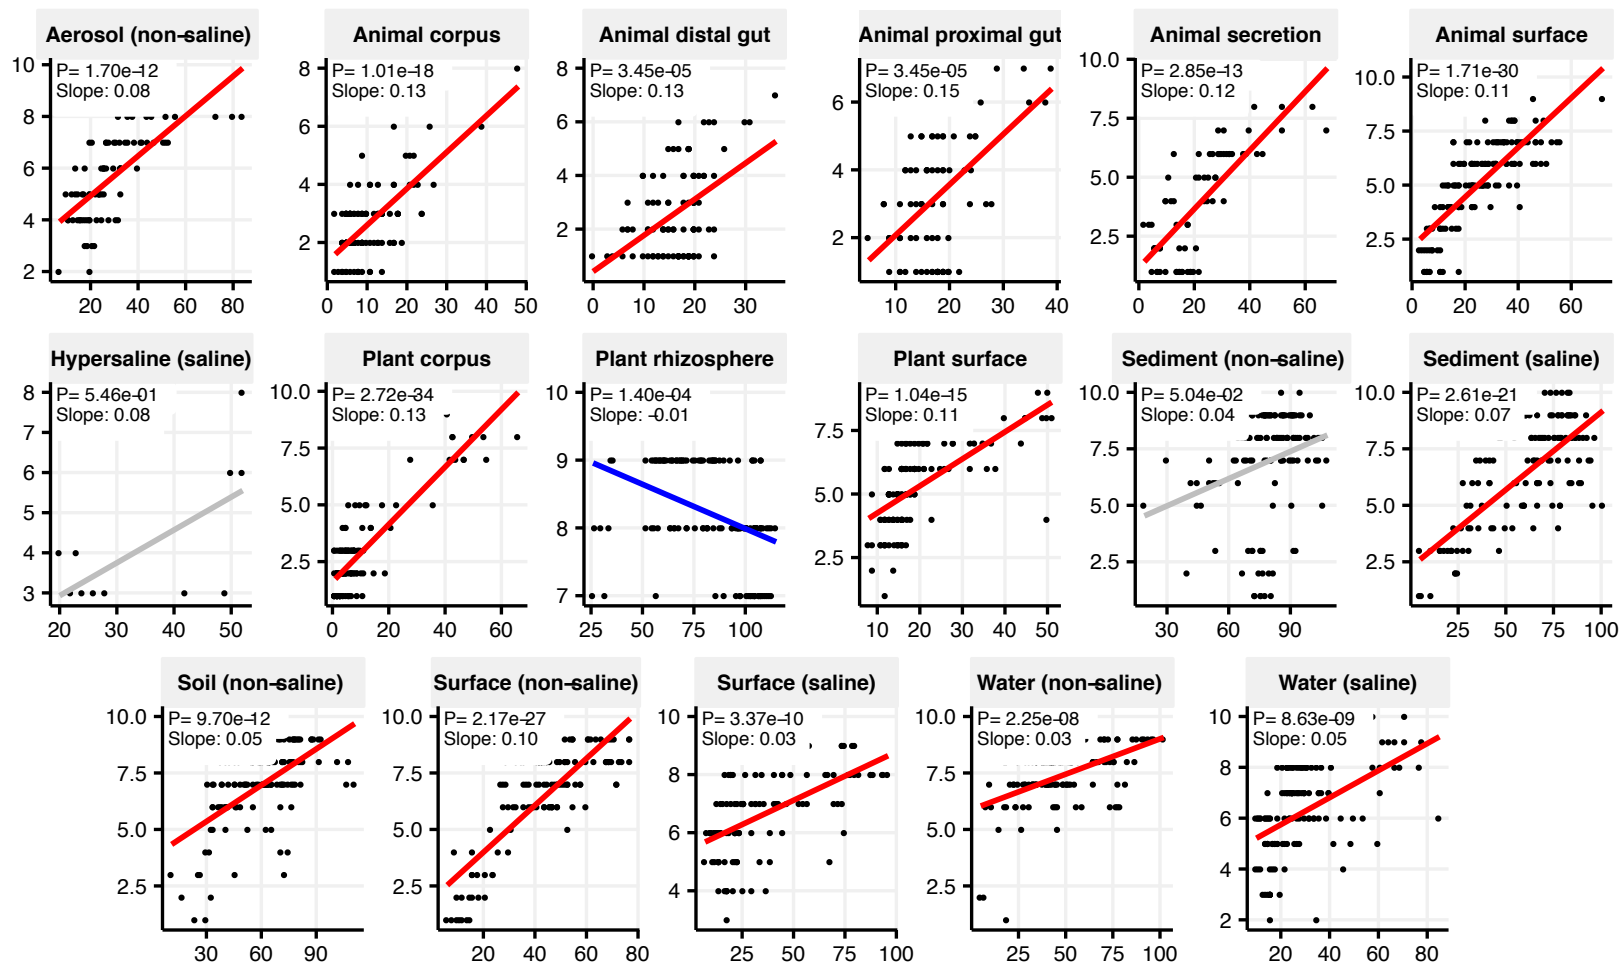

Number of non-Alphaproteobacteria classes

## C. Actinobacteria

Number of Actinobacteria orders

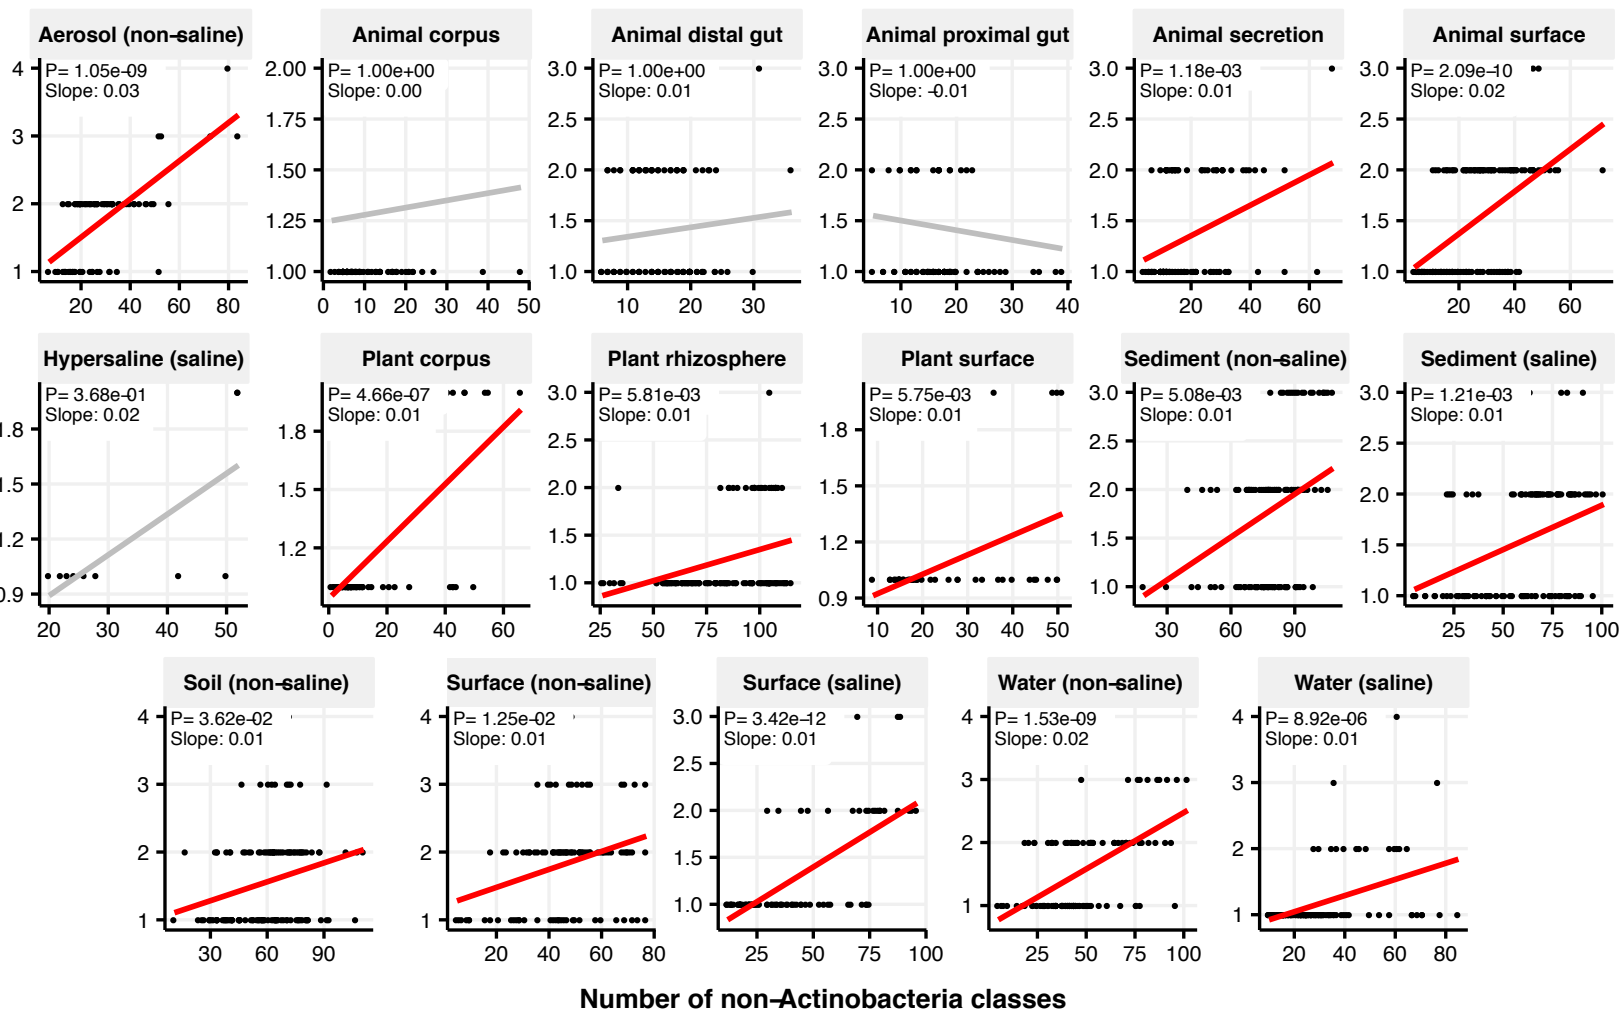

Supplement: supp [file elife-58999-supp-v1.zip › elife_poa_e58999_Figure_2_figure_supplement_3.pdf]
