# Supplementary material for: Does diversity beget diversity in microbiomes?
Source: eLife journal article supplement (doi:10.7554/elife.58999), 2020-11-20

# A. Actinomycetales

Number of Actinomycetales families

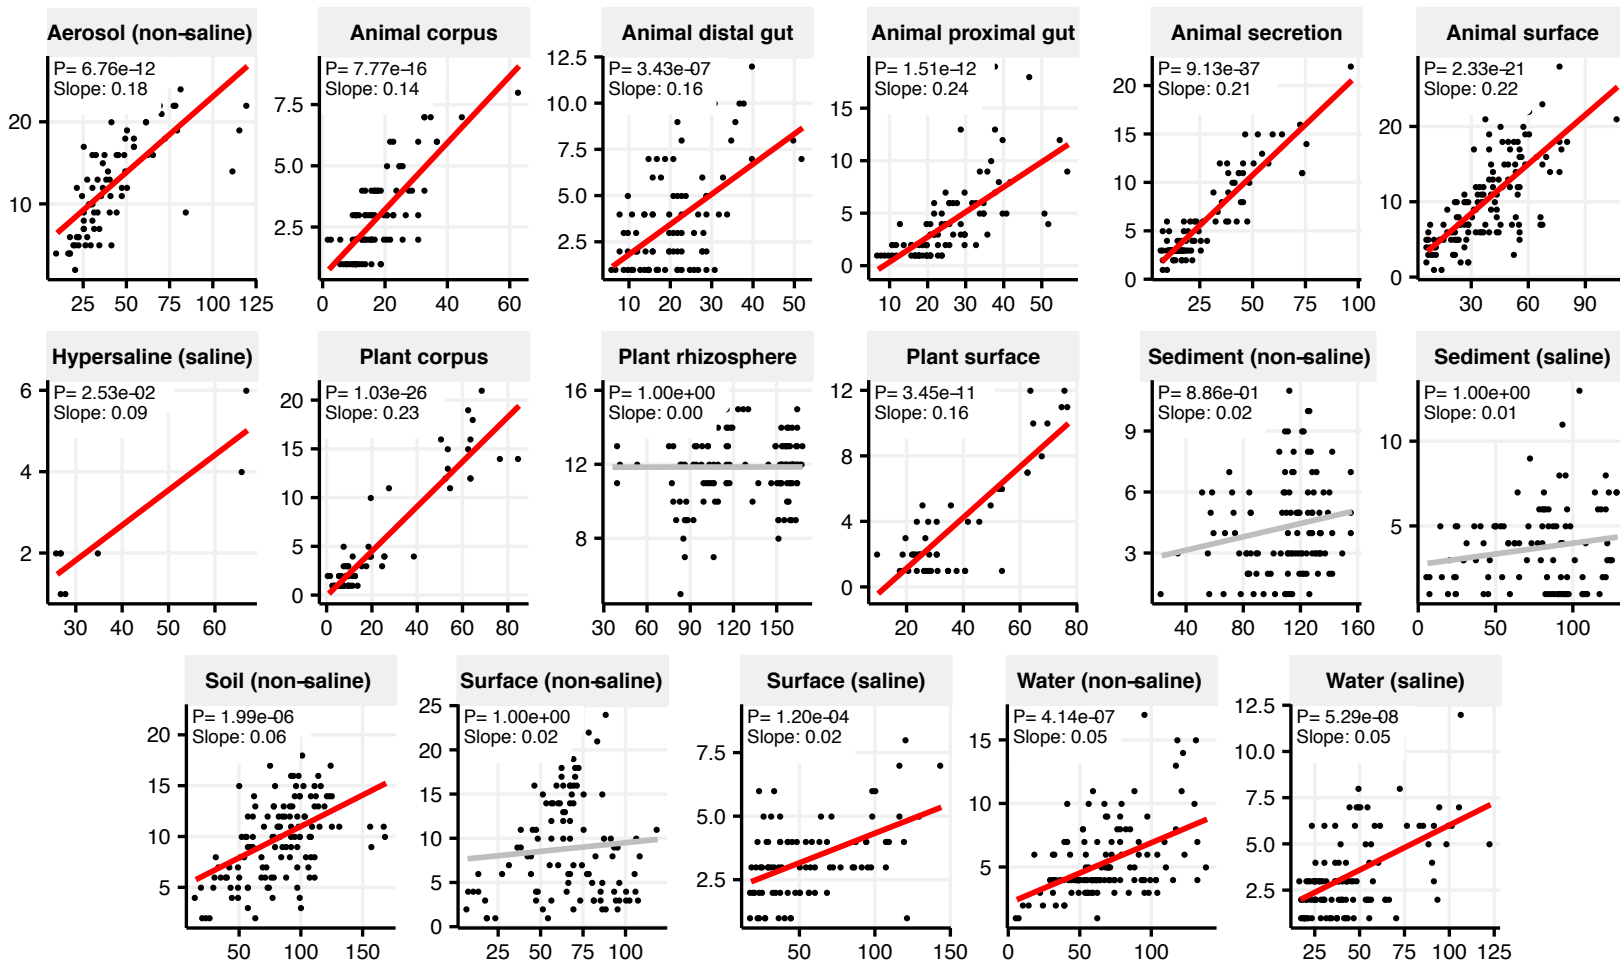

Number of non-Actinomycetales orders

## B. Flavobacteriales

Number of Flavobacteriales families

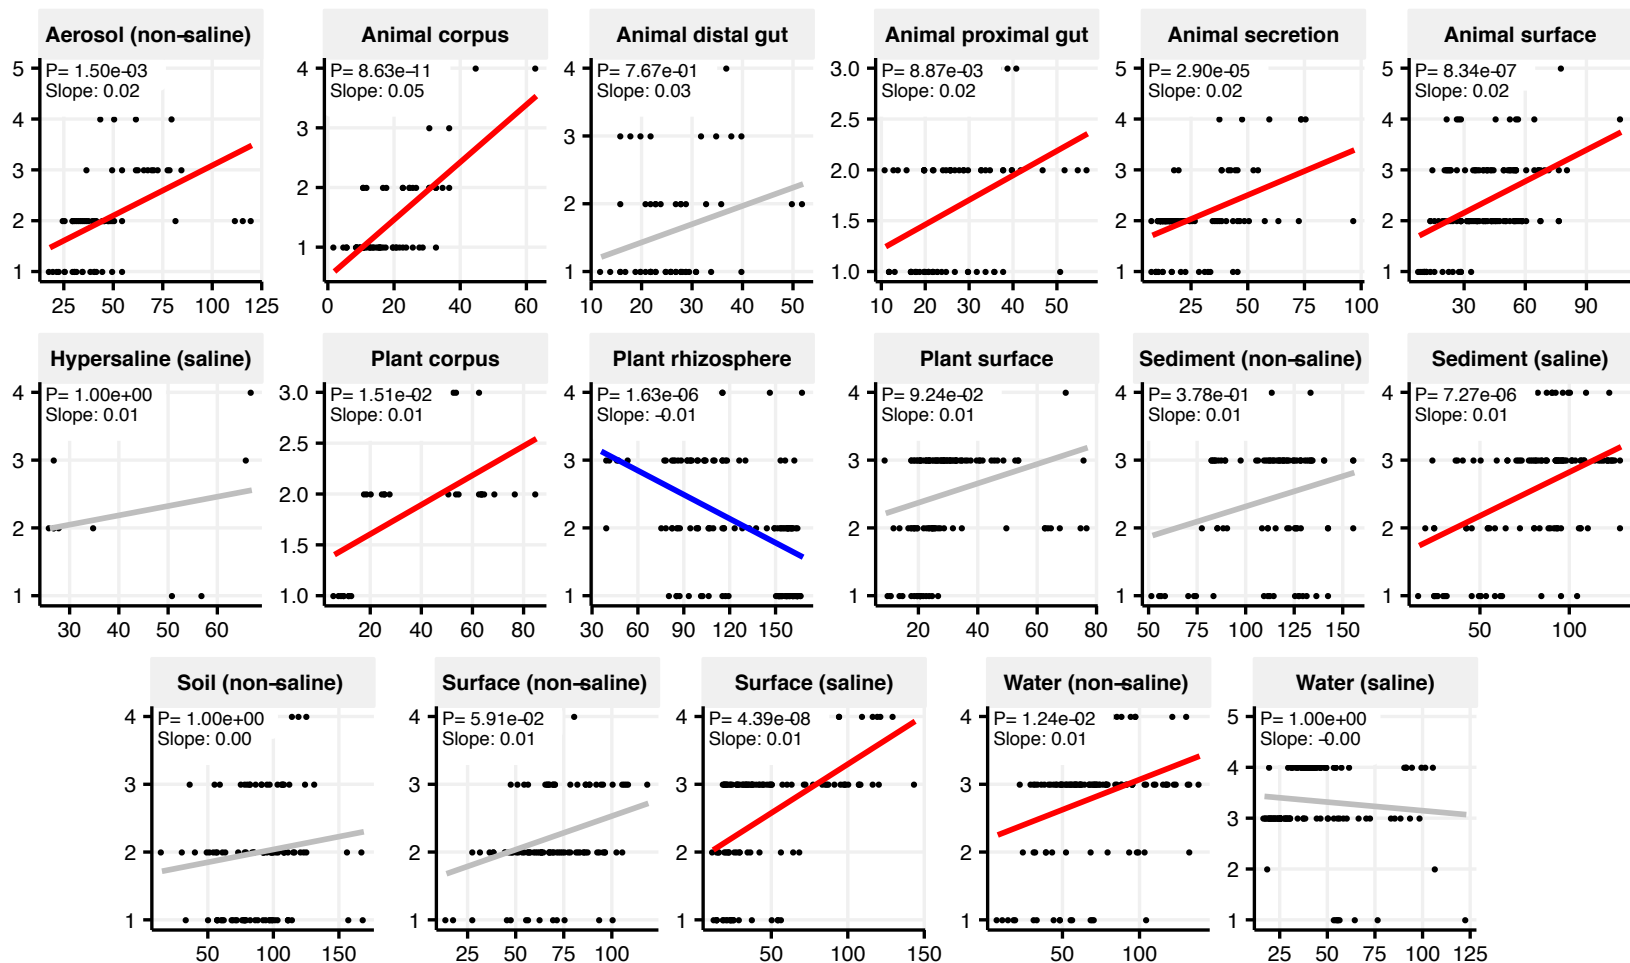

Number of non-Flavobacteriales orders

## C. Rhizobiales

Number of Rhizobiales families

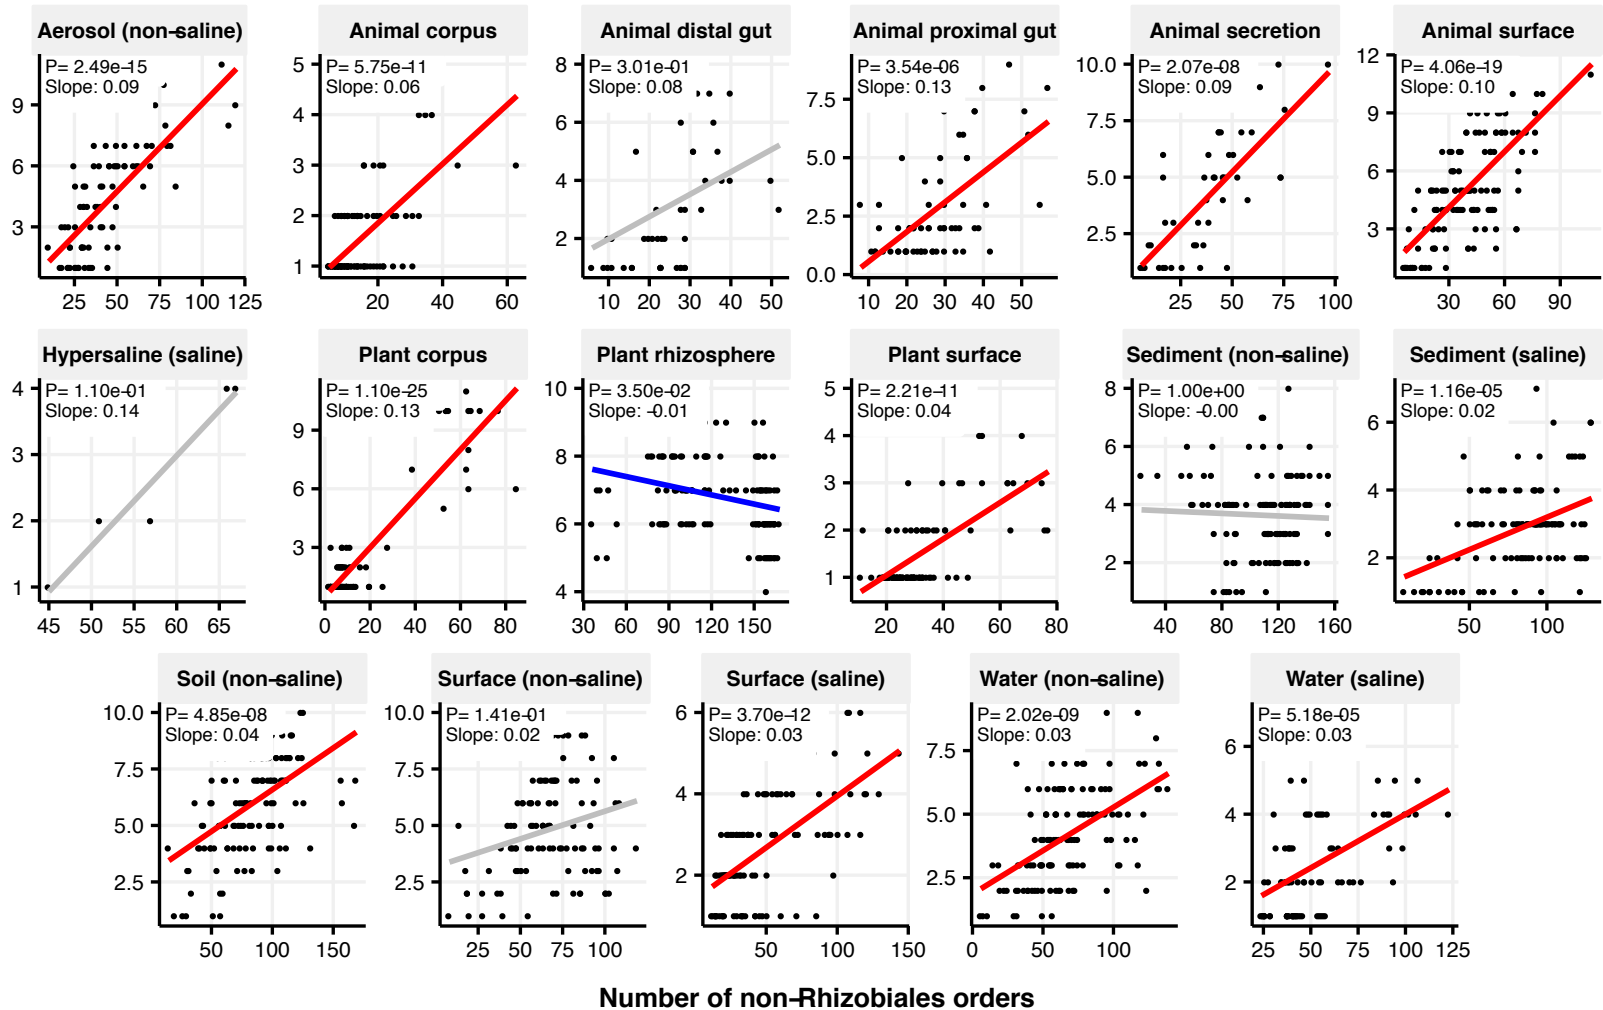

Supplement: supp [file elife-58999-supp-v1.zip › elife_poa_e58999_Figure_2_figure_supplement_4.pdf]
