# Supplementary material for: Does diversity beget diversity in microbiomes?
Source: eLife journal article supplement (doi:10.7554/elife.58999), 2020-11-20
Supplement: supp [file elife-58999-supp-v1.zip › elife_poa_e58999_Figure_2_figure_supplement_5.pdf]

## A. Flavobacteriaceae

Number of Flavobacteriaceae genera

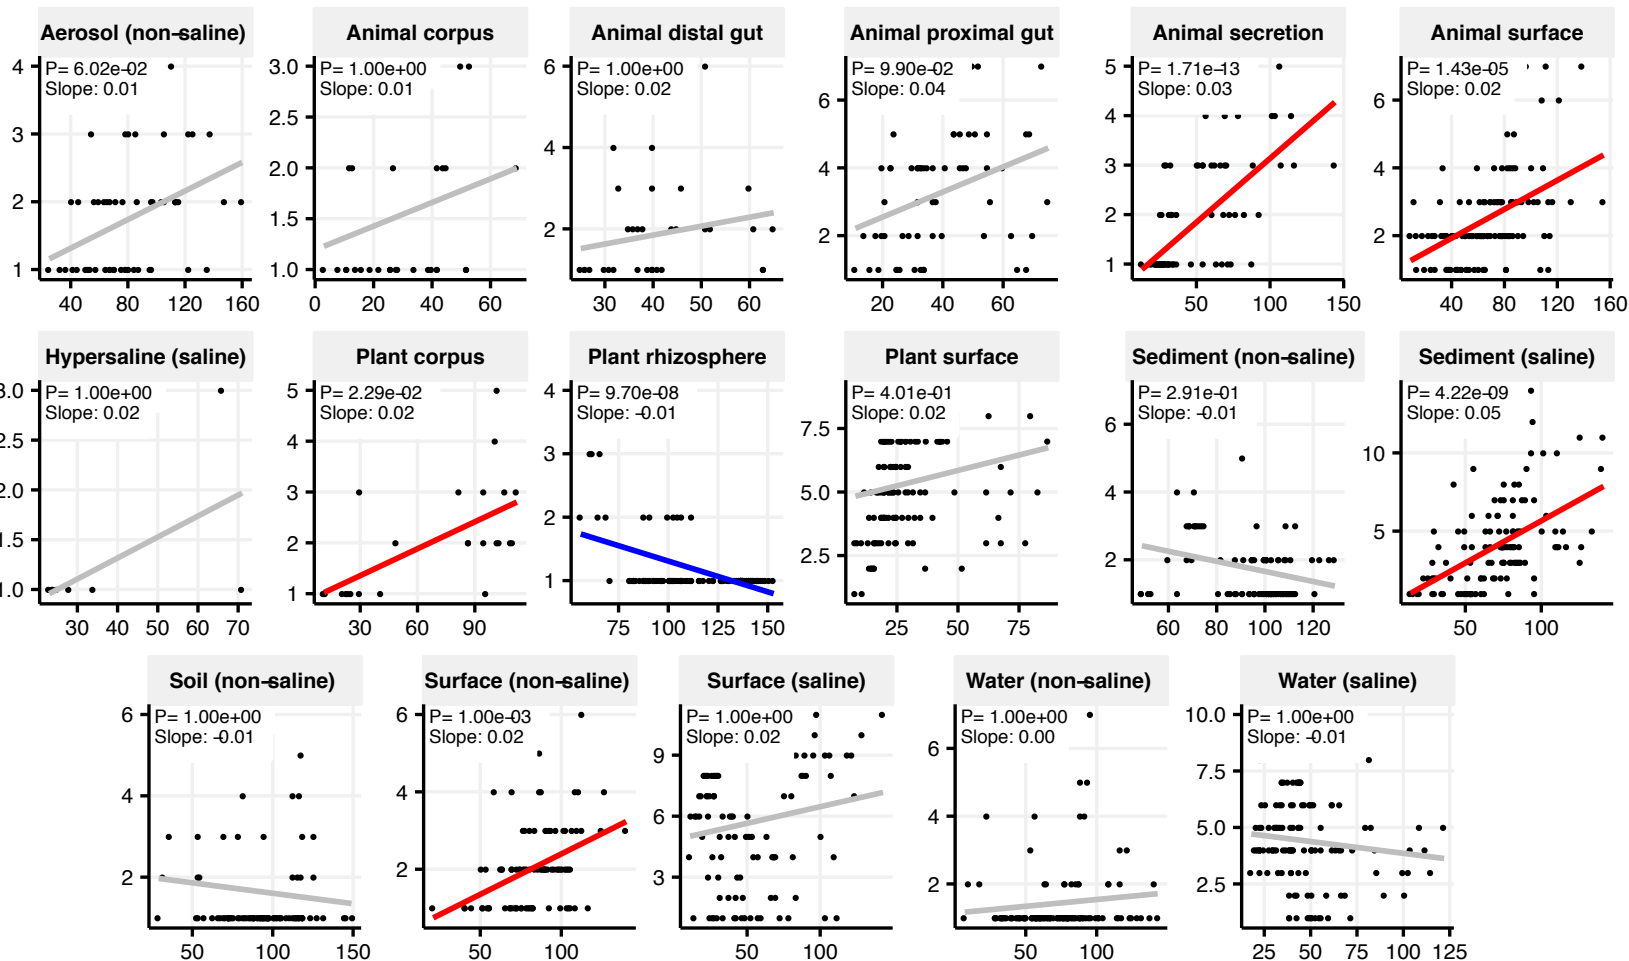

Number of non-Flavobacteriaceae families

## B. Sphingomonadaceae

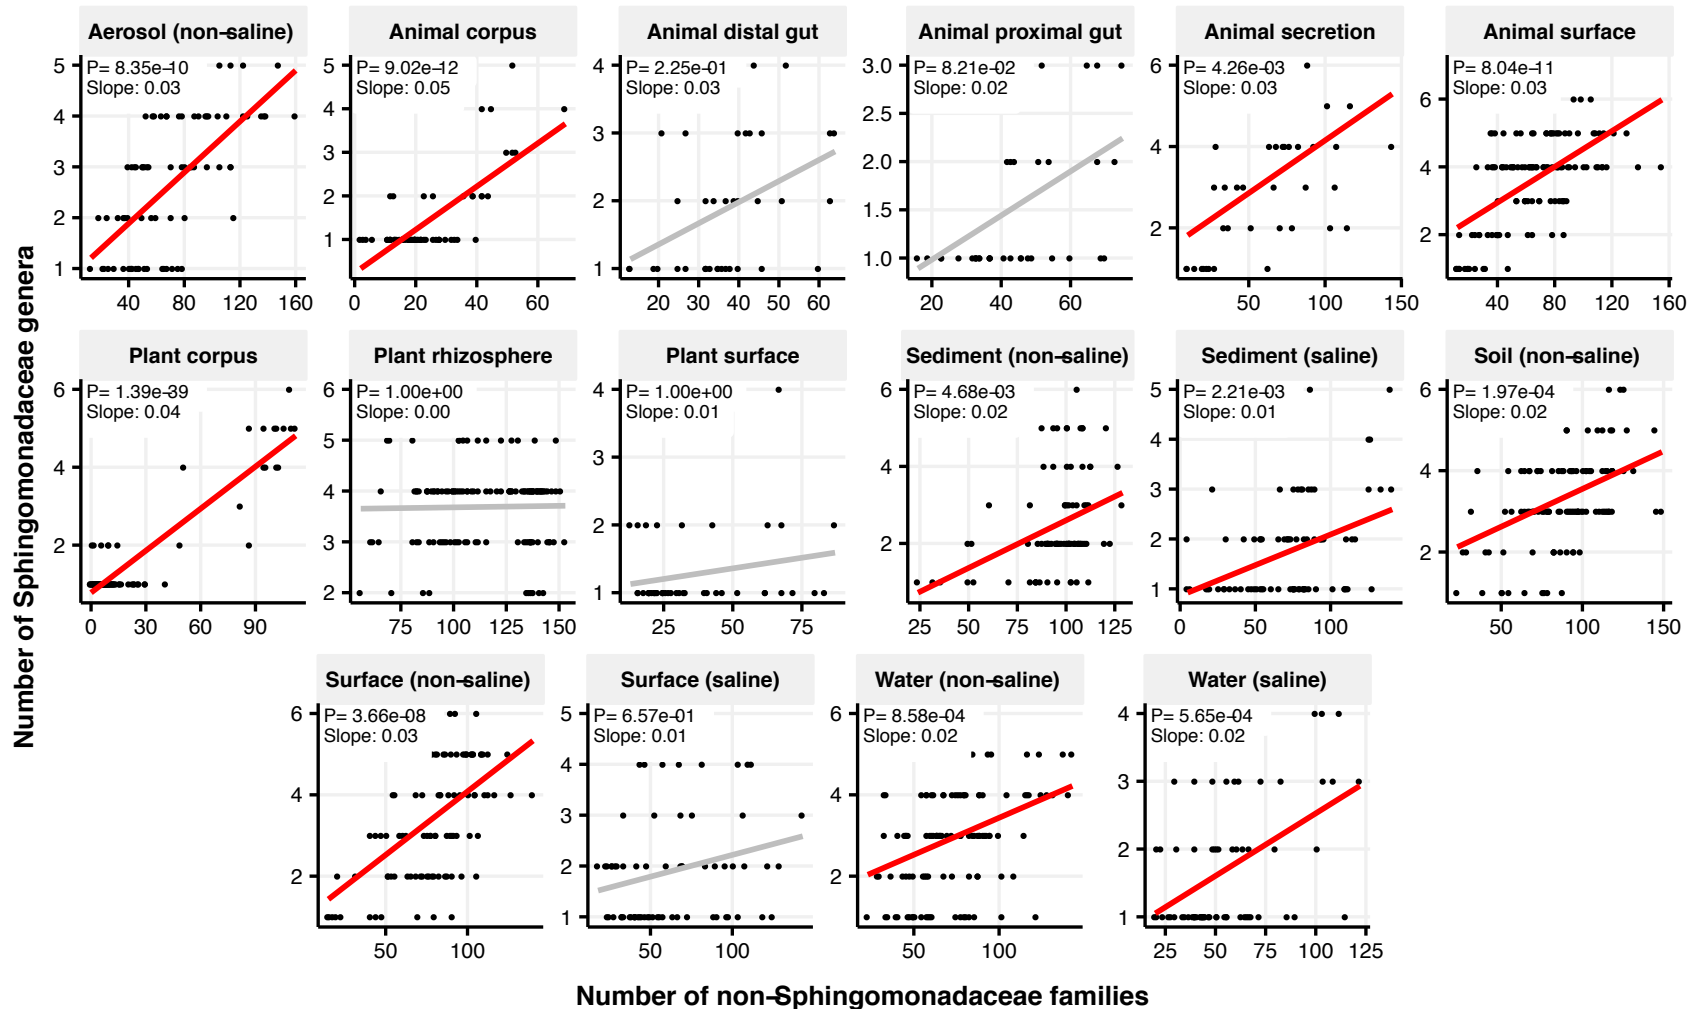

## C. Verrucomicrobiaceae

Number of Verrucomicrobiaceae genera

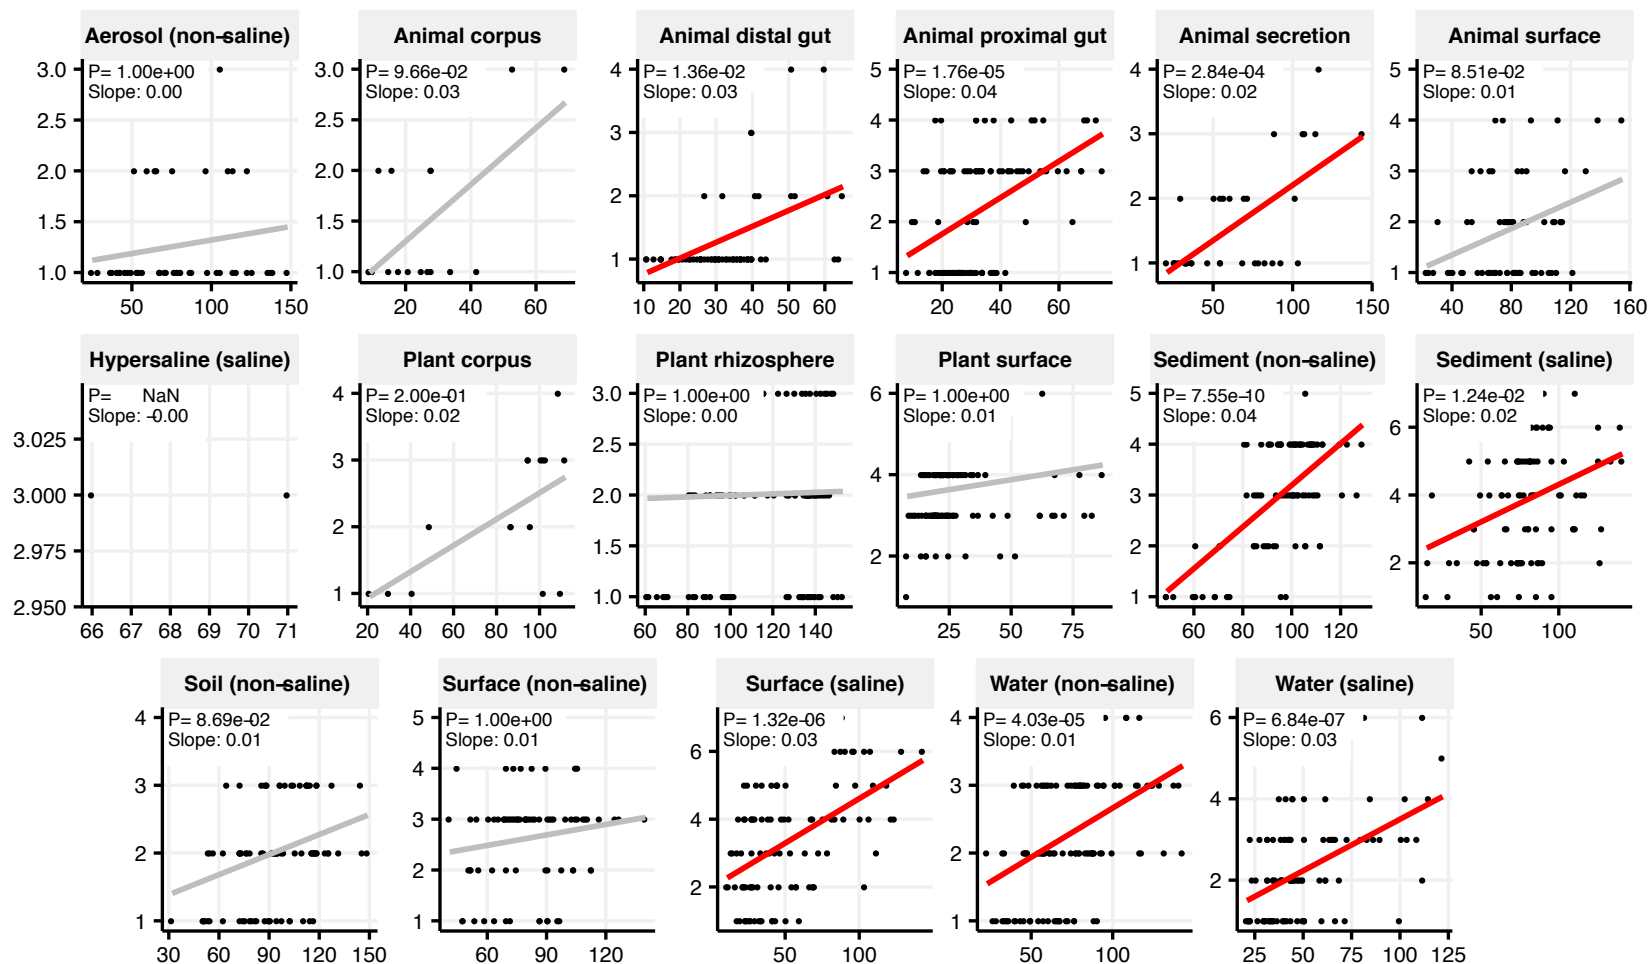

Number of non-Verrucomicrobiaceae families
