# Supplementary material for: Does diversity beget diversity in microbiomes?
Source: eLife journal article supplement (doi:10.7554/elife.58999), 2020-11-20
Supplement: supp [file elife-58999-supp-v1.zip › elife_poa_e58999_Figure_2_figure_supplement_6.pdf]

## A. *Pseudomonas*

Number of *Pseudomonas* ASVs

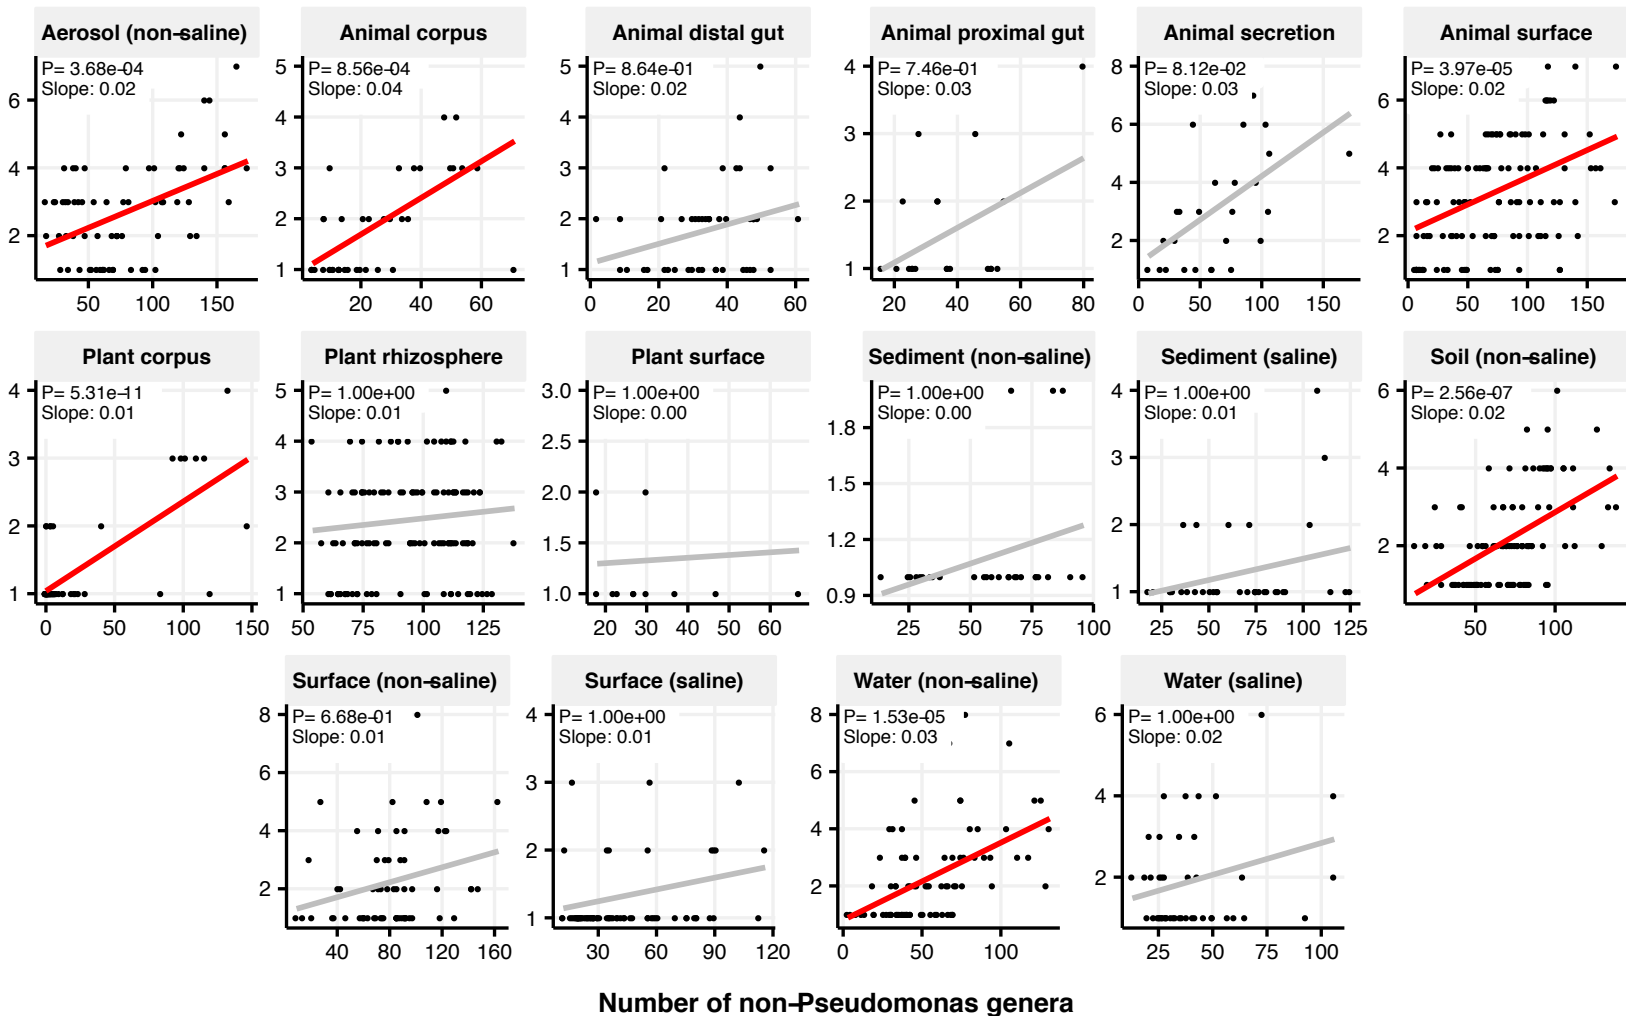

## B. Planctomyces

Number of Planctomyces ASVs

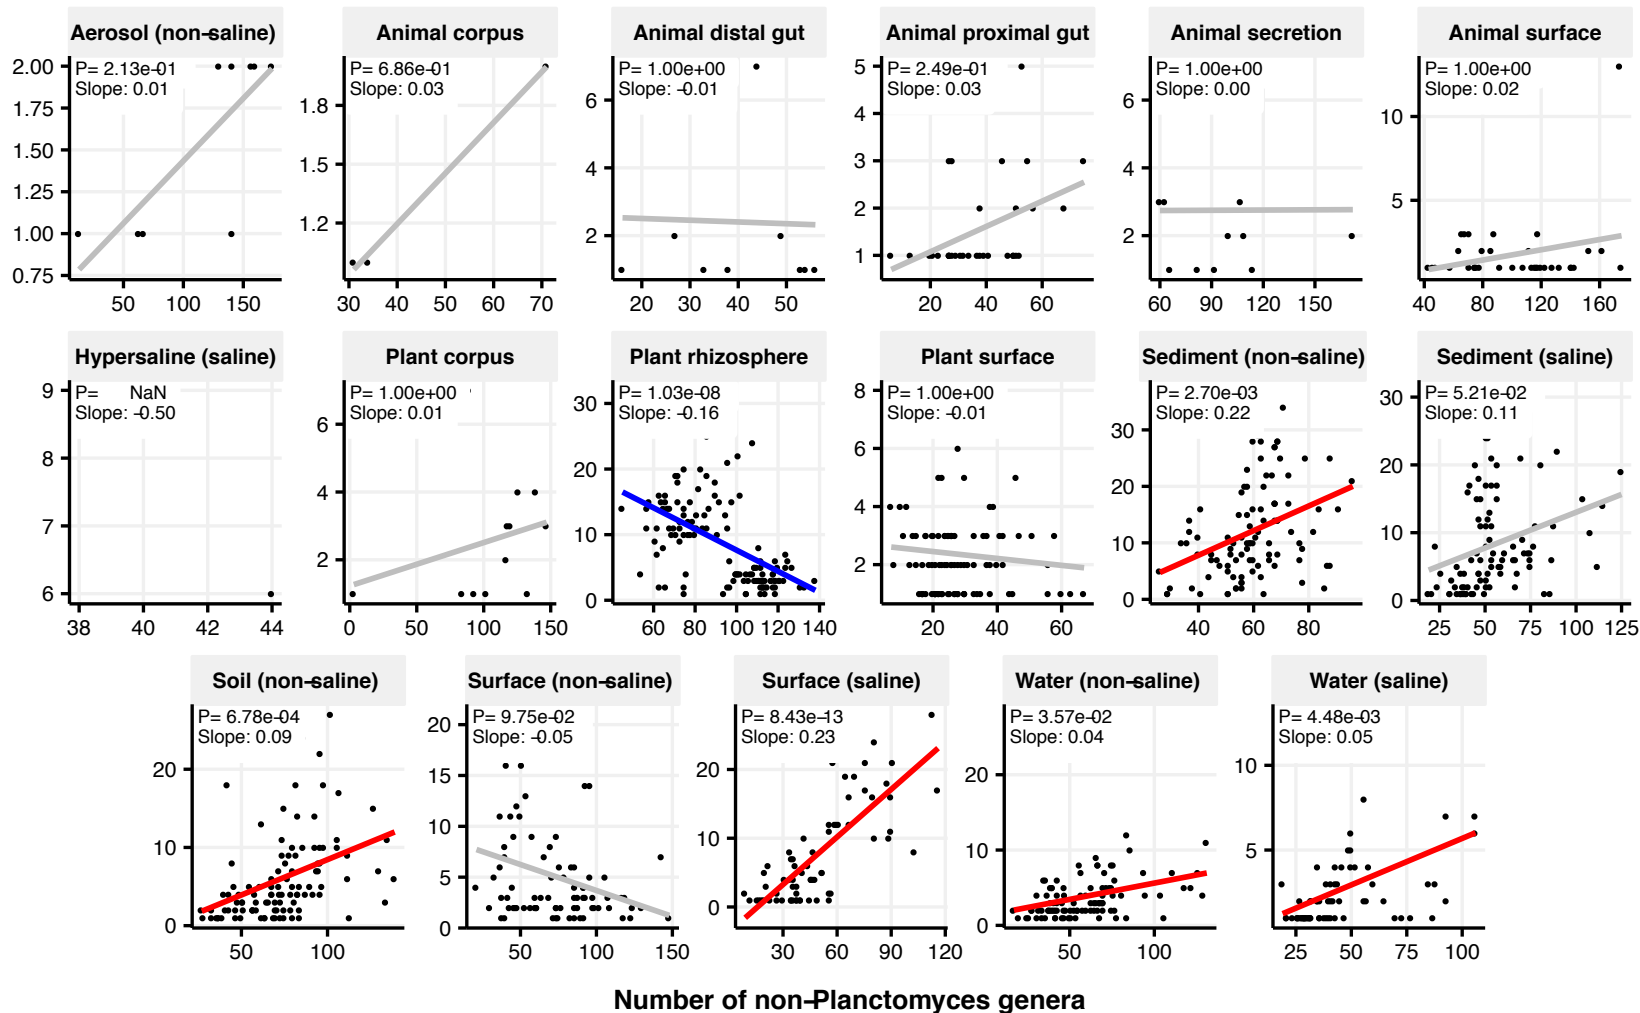

## C. Clostridium

Number of Clostridium ASVs

**Aerosol (non-saline)**

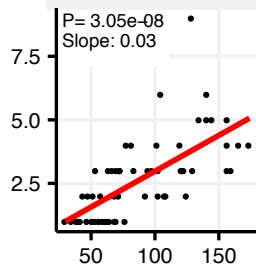

**Animal corpus**

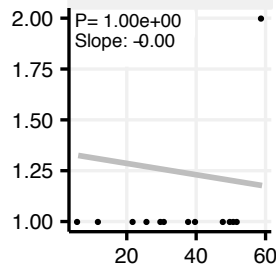

**Animal distal gut**

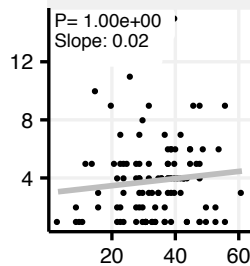

**Animal proximal gut**

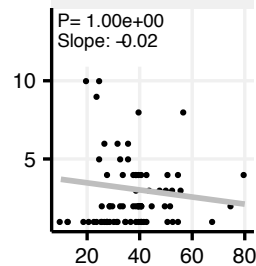

**Animal secretion**

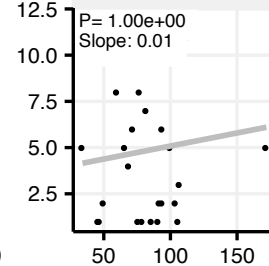

**Animal surface**

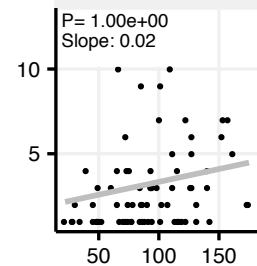

**Hypersaline (saline)**

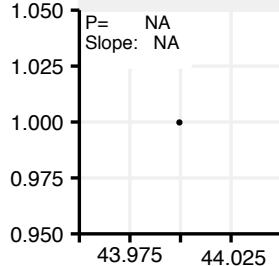

**Plant corpus**

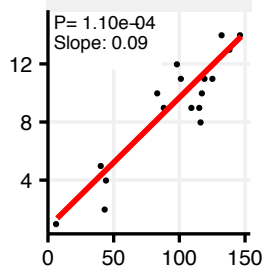

**Plant rhizosphere**

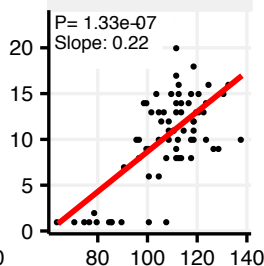

**Plant surface**

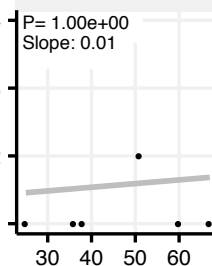

**Sediment (non-saline)**

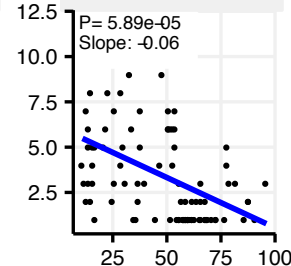

**Sediment (saline)**

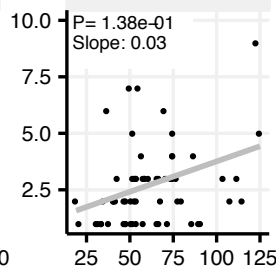

**Soil (non-saline)**

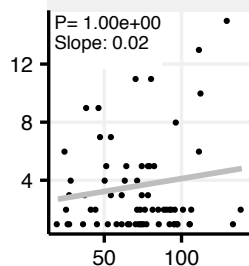

**Surface (non-saline)**

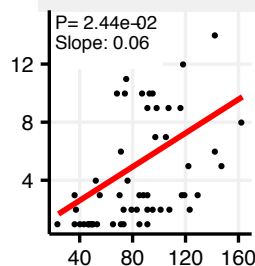

**Surface (saline)**

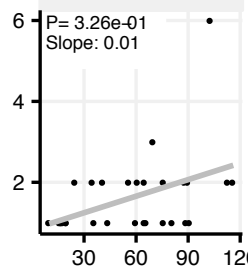

**Water (non-saline)**

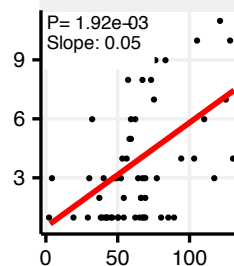

**Water (saline)**

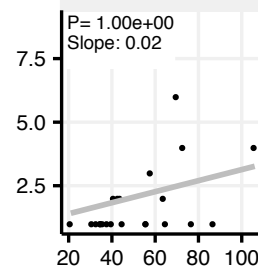

Number of non-Clostridium genera
