# Supplementary material for: Does diversity beget diversity in microbiomes?
Source: eLife journal article supplement (doi:10.7554/elife.58999), 2020-11-20

**A. True ratio = 2 ASVs/genus**

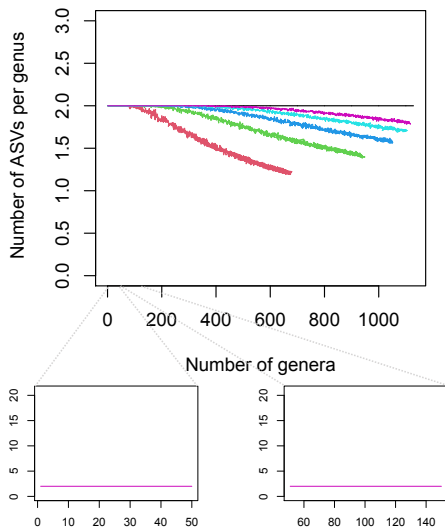

**C. True ratio = 3 classes/phylum**

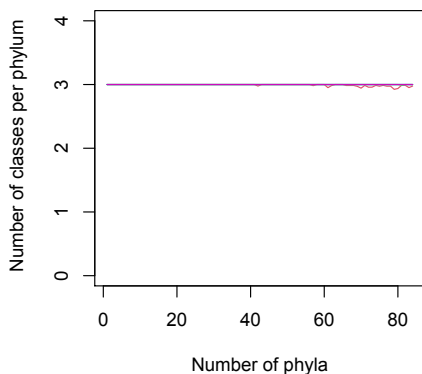

**B. True ratio = 20 ASVs/genus**

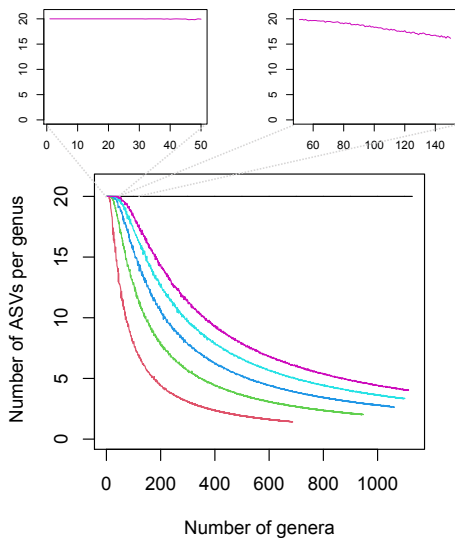

**Rarefaction level**

**(# of sequences sampled)**

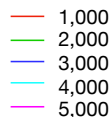

**D. True ratio = 10 classes/phylum**

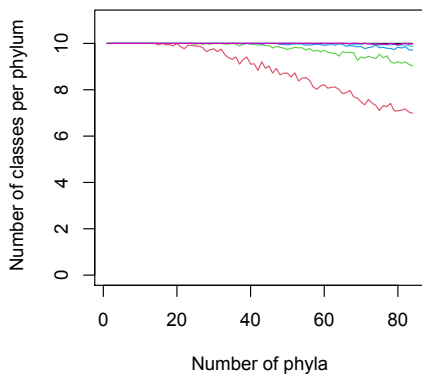

Supplement: supp [file elife-58999-supp-v1.zip › elife_poa_e58999_Figure_2_figure_supplement_9.pdf]
