# Supplementary material for: Does diversity beget diversity in microbiomes?
Source: eLife journal article supplement (doi:10.7554/elife.58999), 2020-11-20

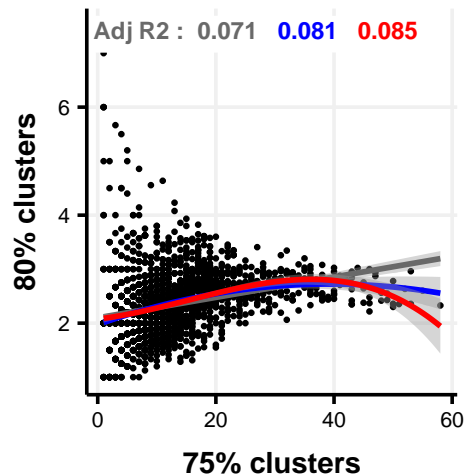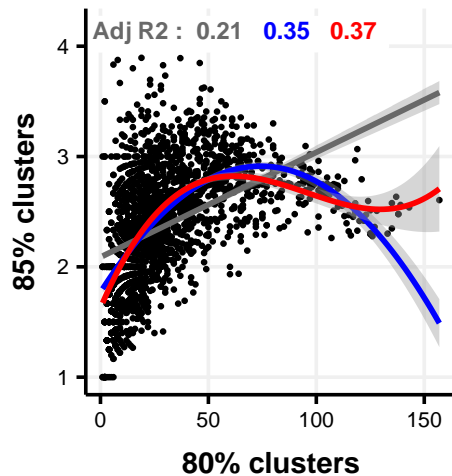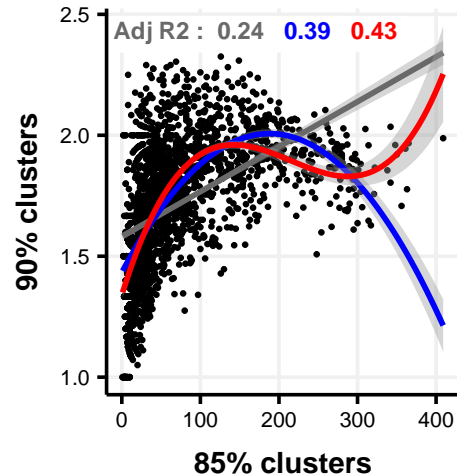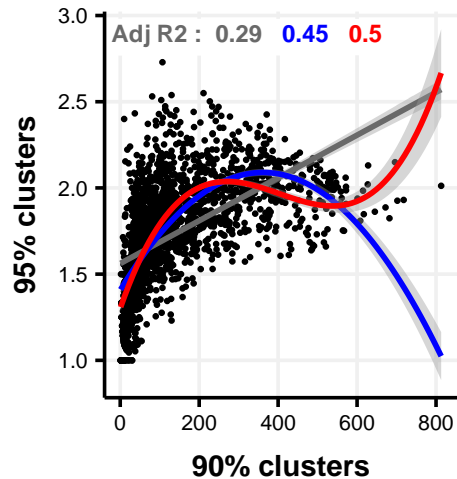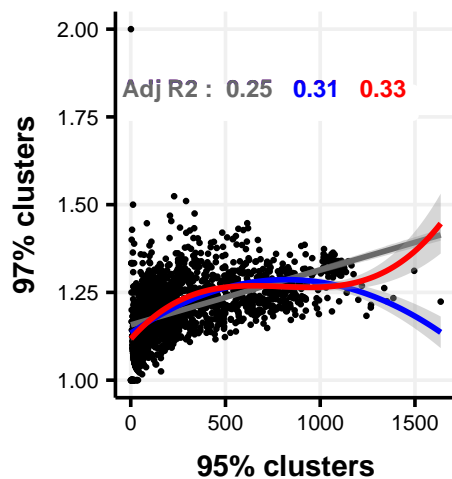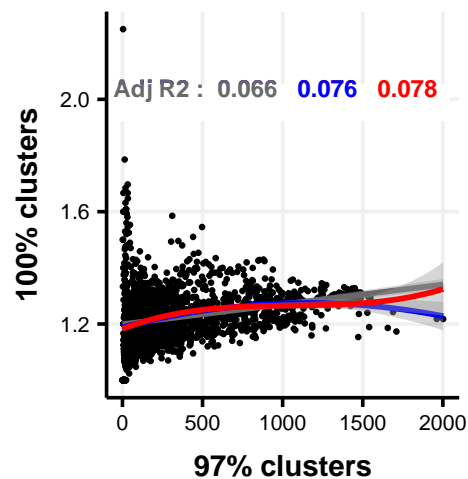

Supplement: supp [file elife_poa_e58999_Figure_2_figure_supplement_10.pdf › elife_poa_e58999_Figure_2_figure_supplement_10.pdf]
