# Supplementary figures and images for: Does diversity beget diversity in microbiomes?
Source: eLife journal article supplement (doi:10.7554/elife.58999), 2020-11-20

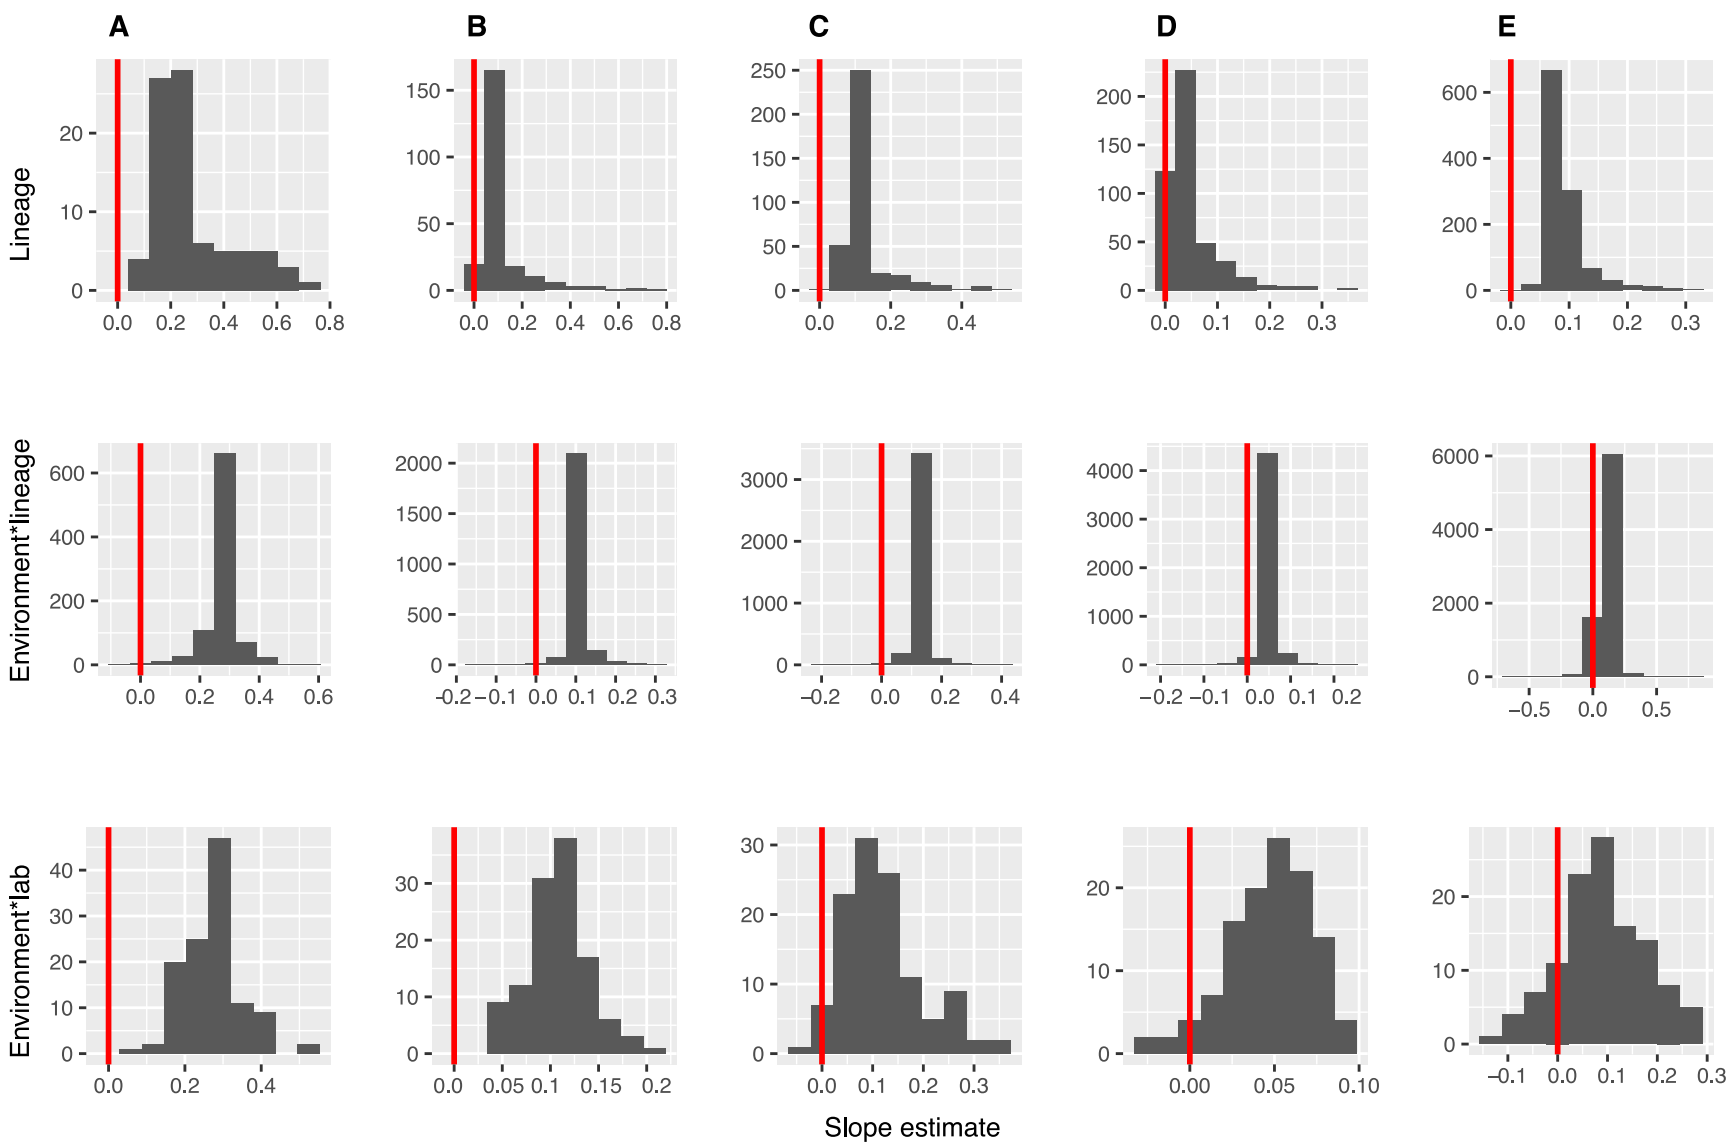

Supplement: supp [file elife-58999-supp-v1.zip › elife_poa_e58999_Figure_2_figure_supplement_1.pdf]

## A. Model 1

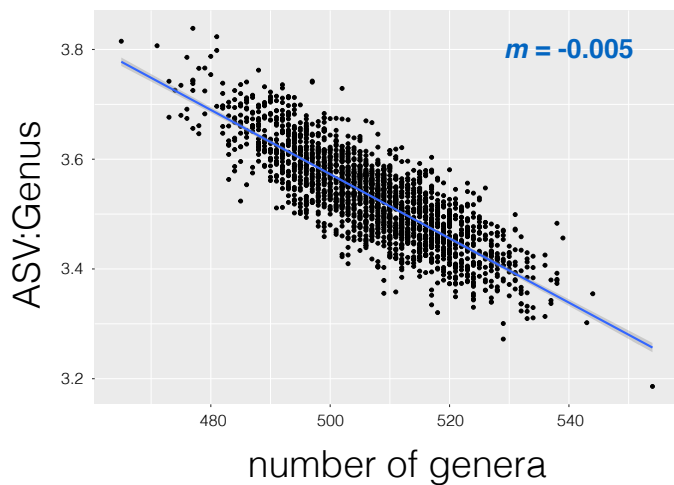

## B. Model 2

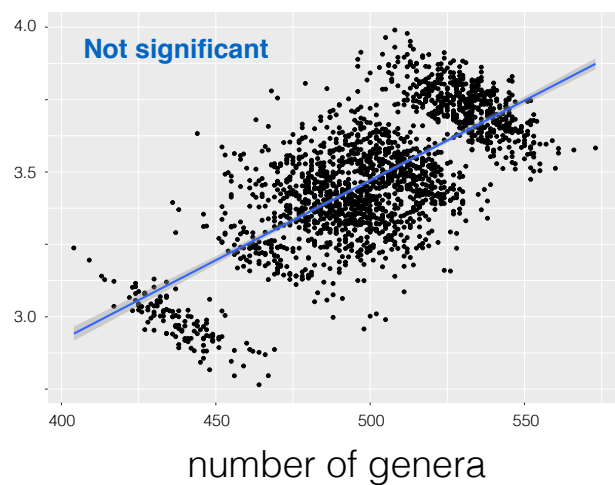

## C. Model 3

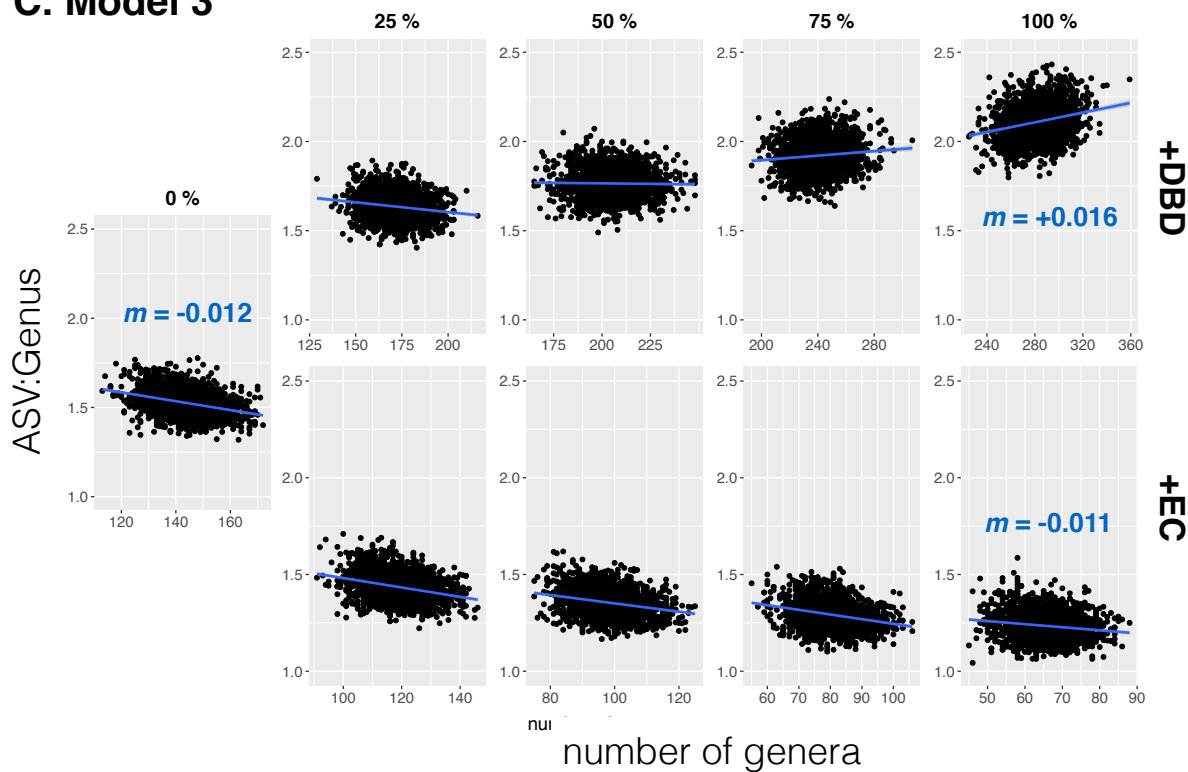

Supplement: supp [file elife-58999-supp-v1.zip › elife_poa_e58999_Figure_2_figure_supplement_7.pdf]

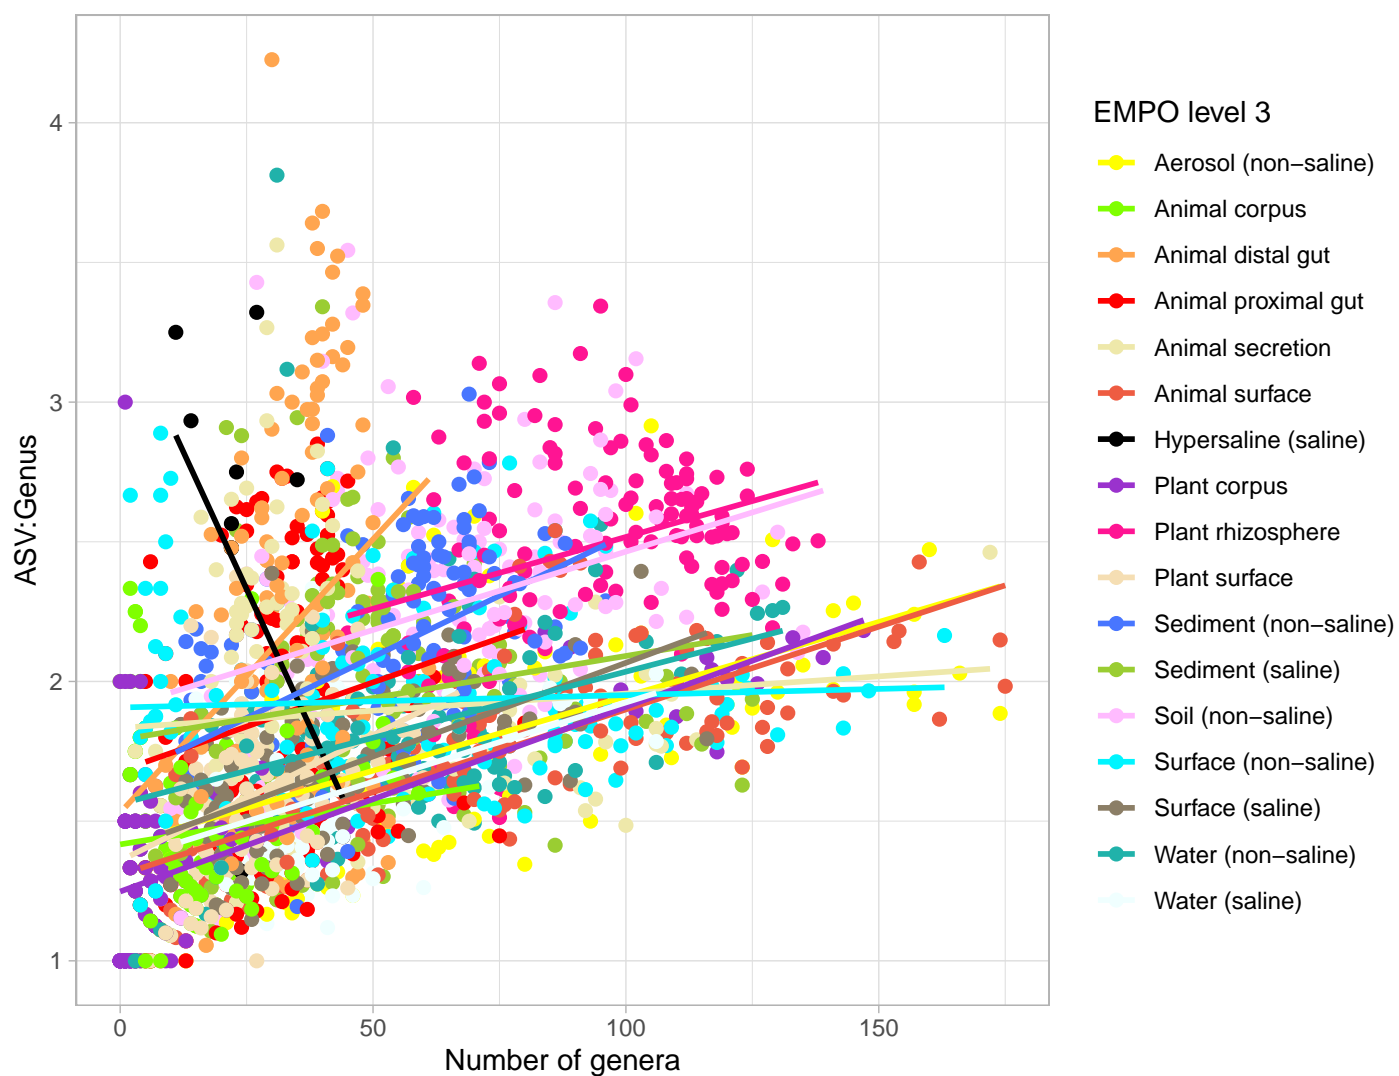

Supplement: supp [file elife-58999-supp-v1.zip › elife_poa_e58999_Figure_2_figure_supplement_8.pdf]

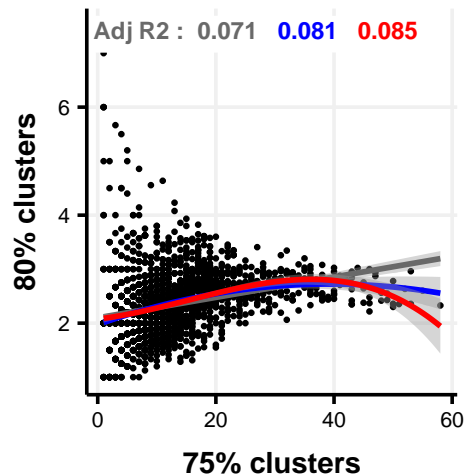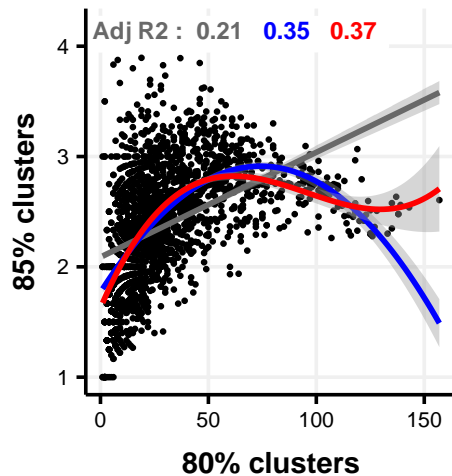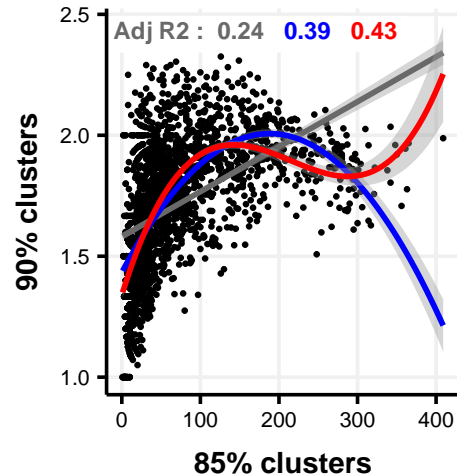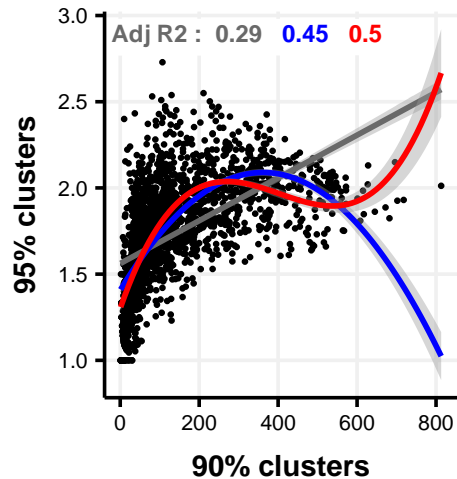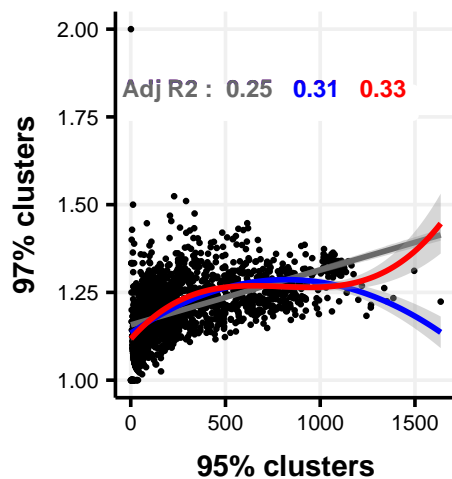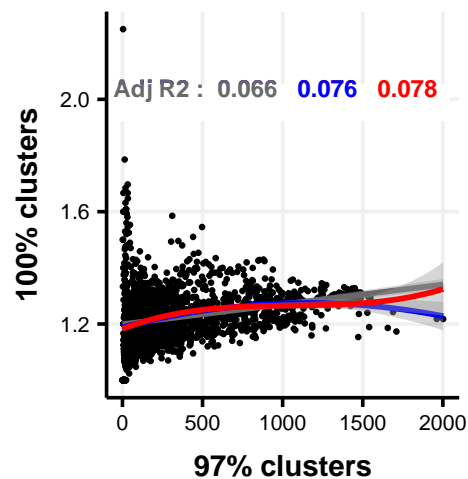

Supplement: supp [file elife-58999-supp-v1.zip › elife_poa_e58999_Figure_2_figure_supplement_10.pdf]

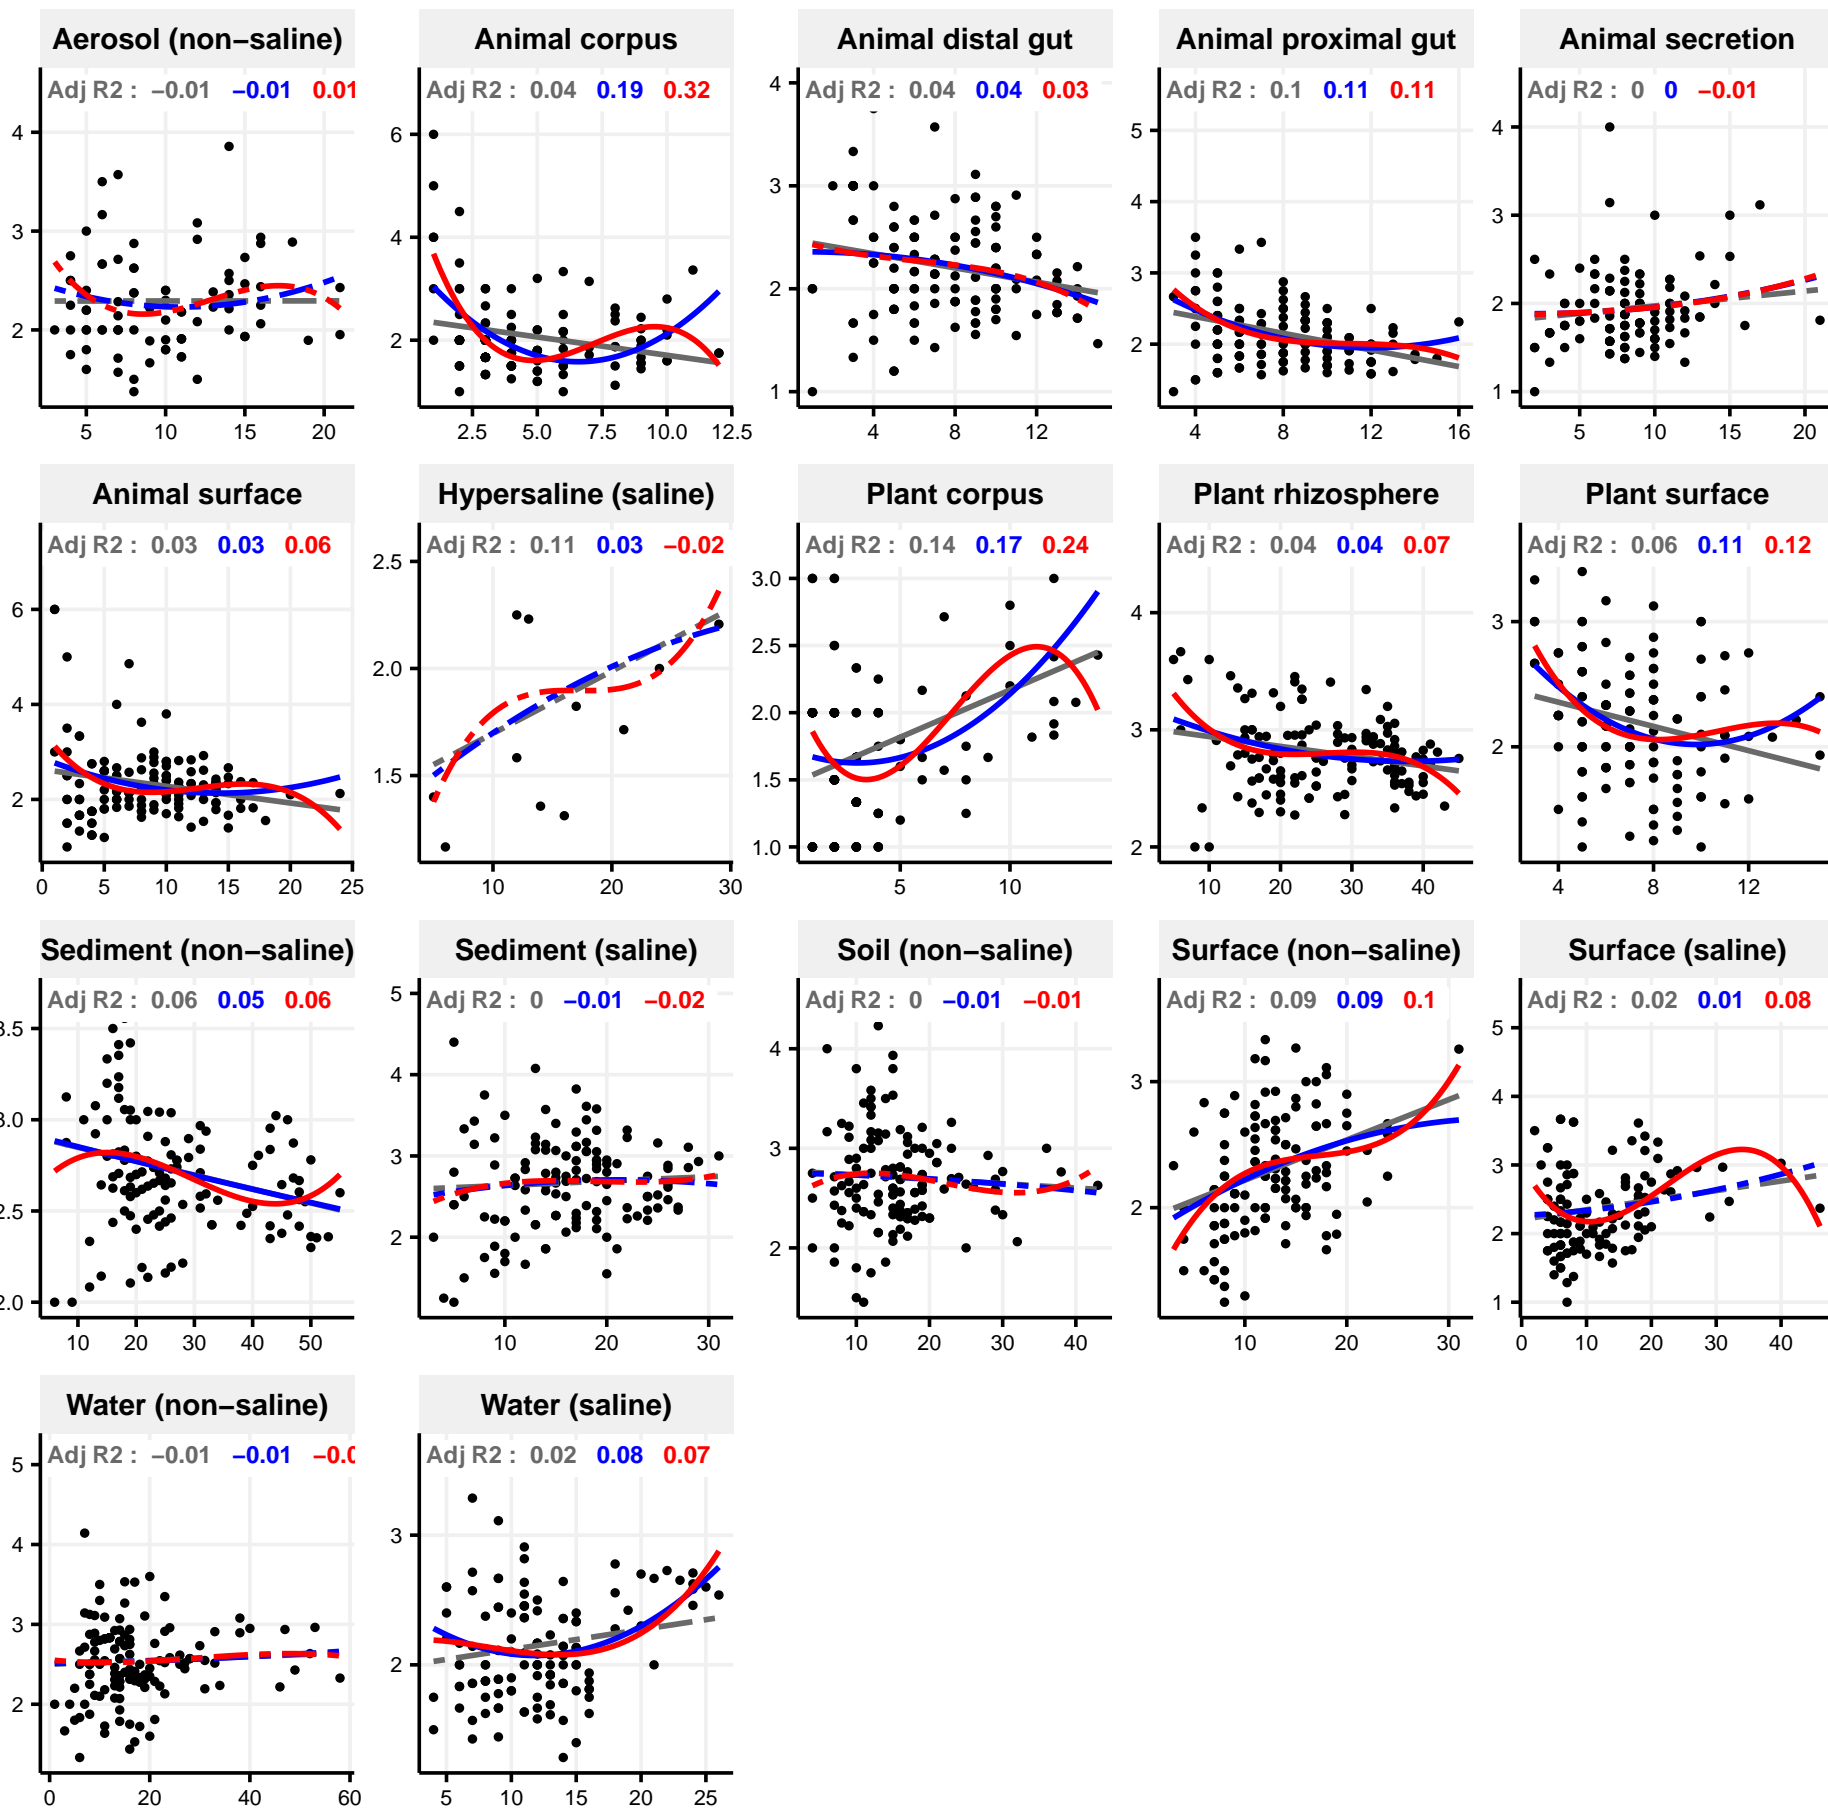

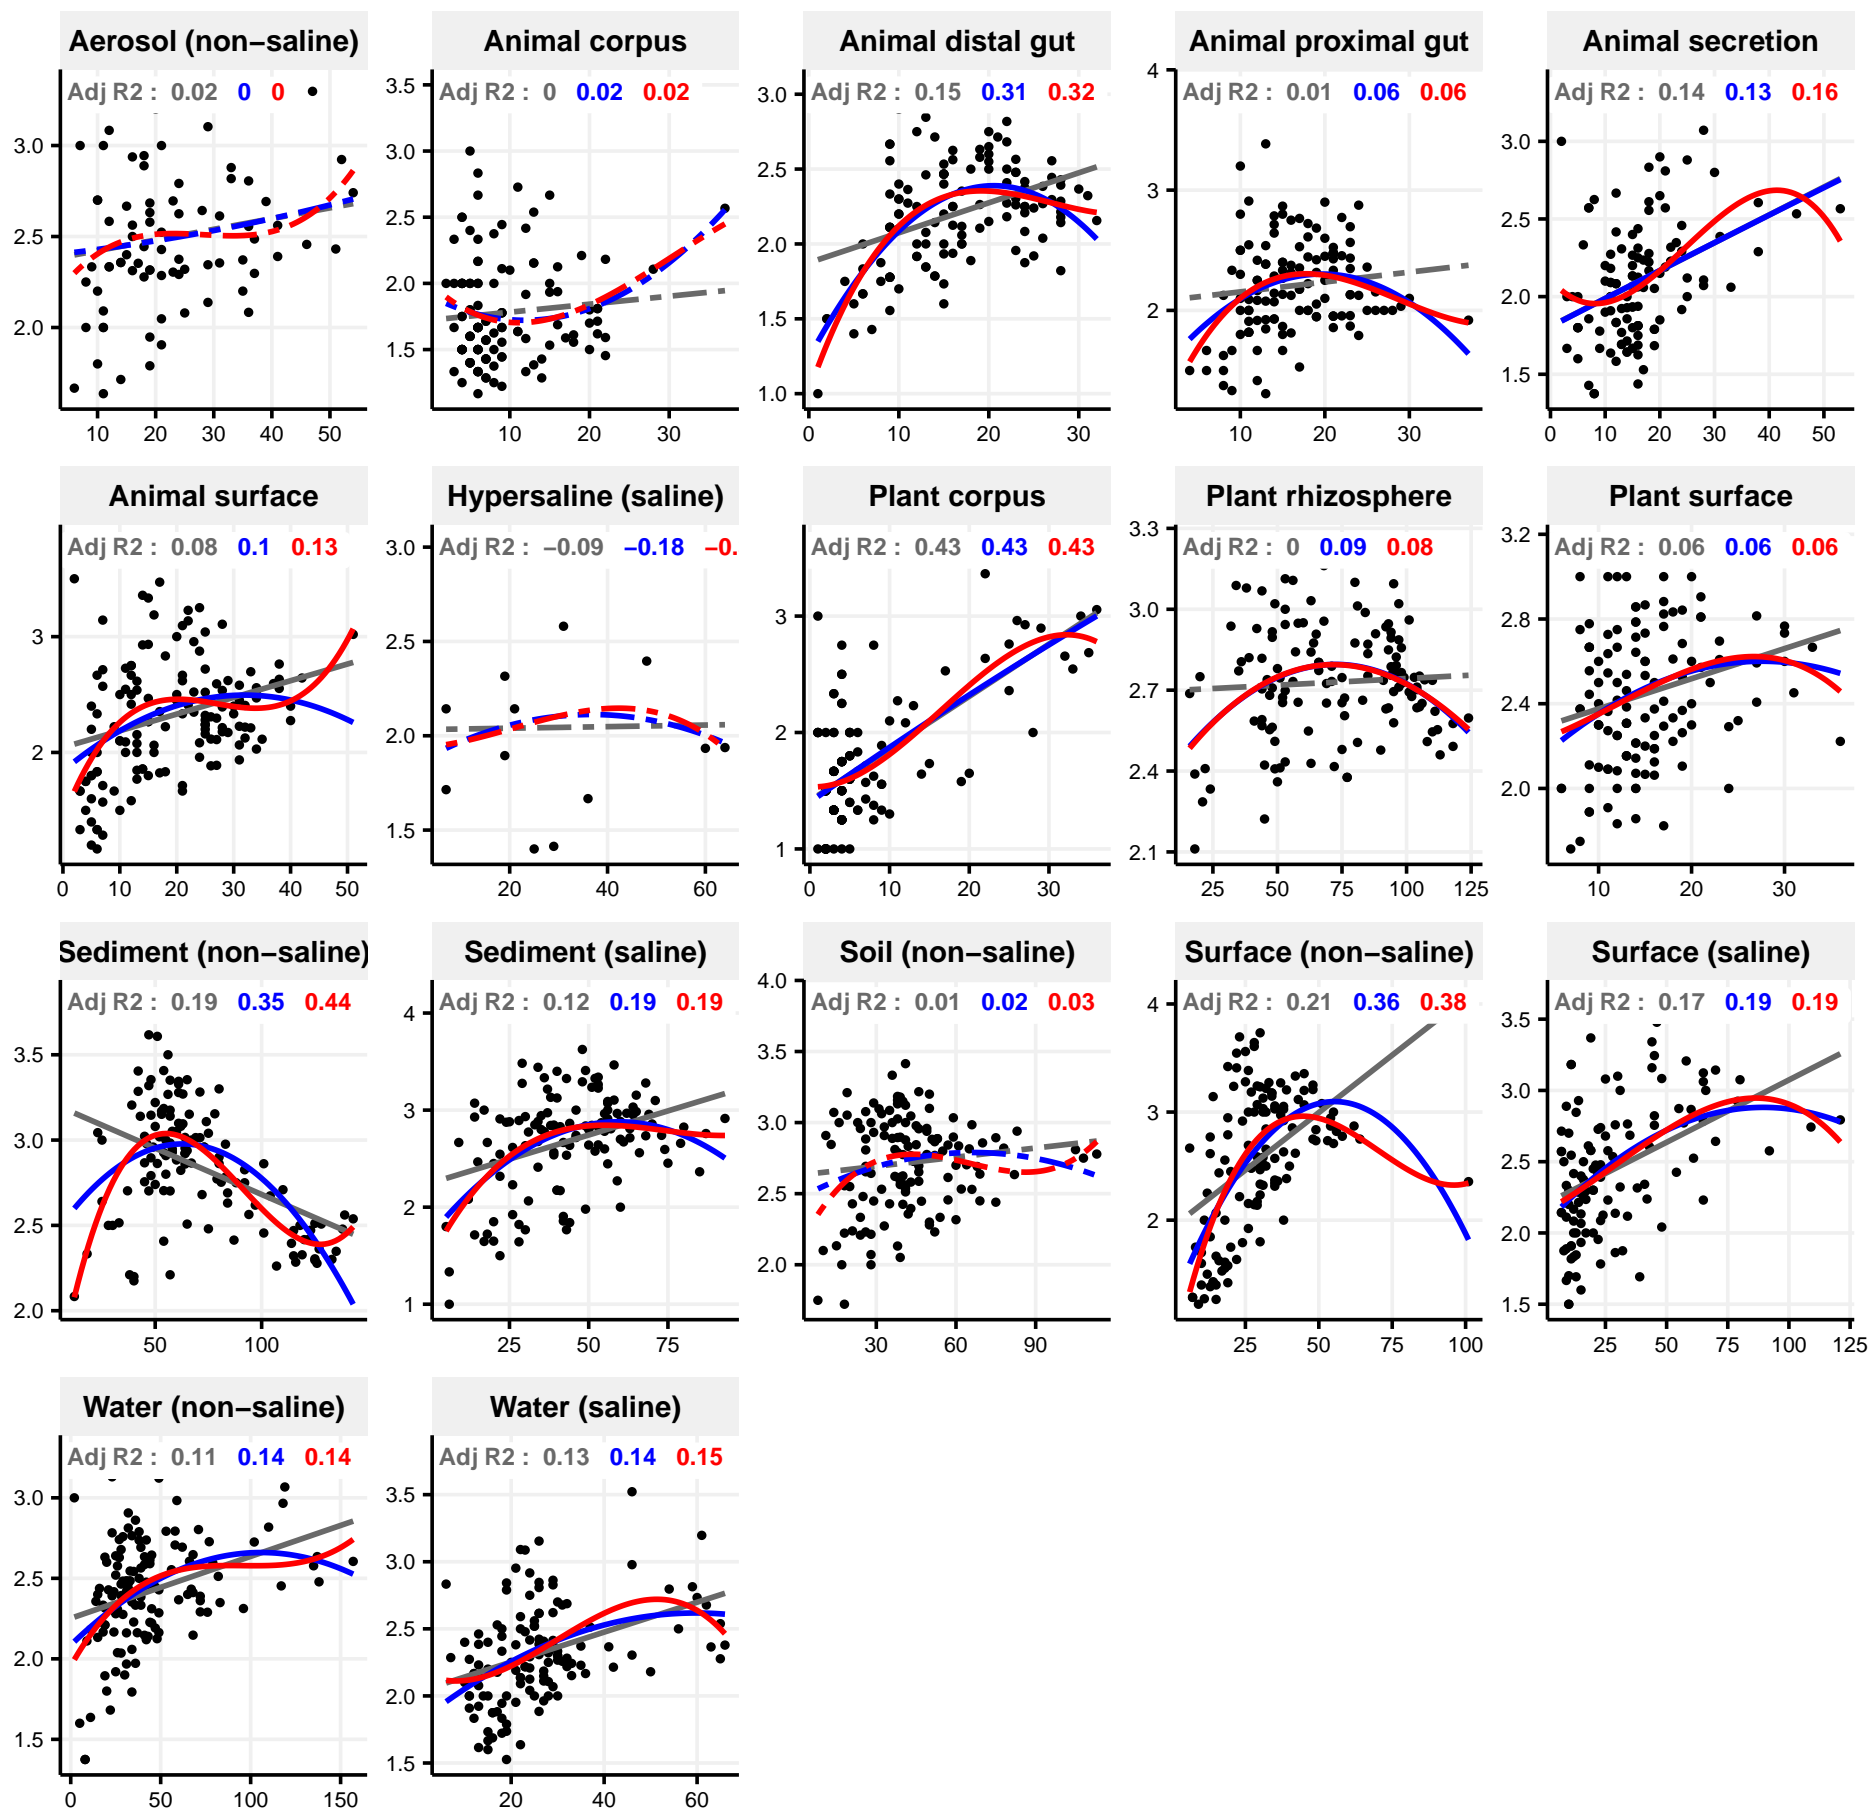

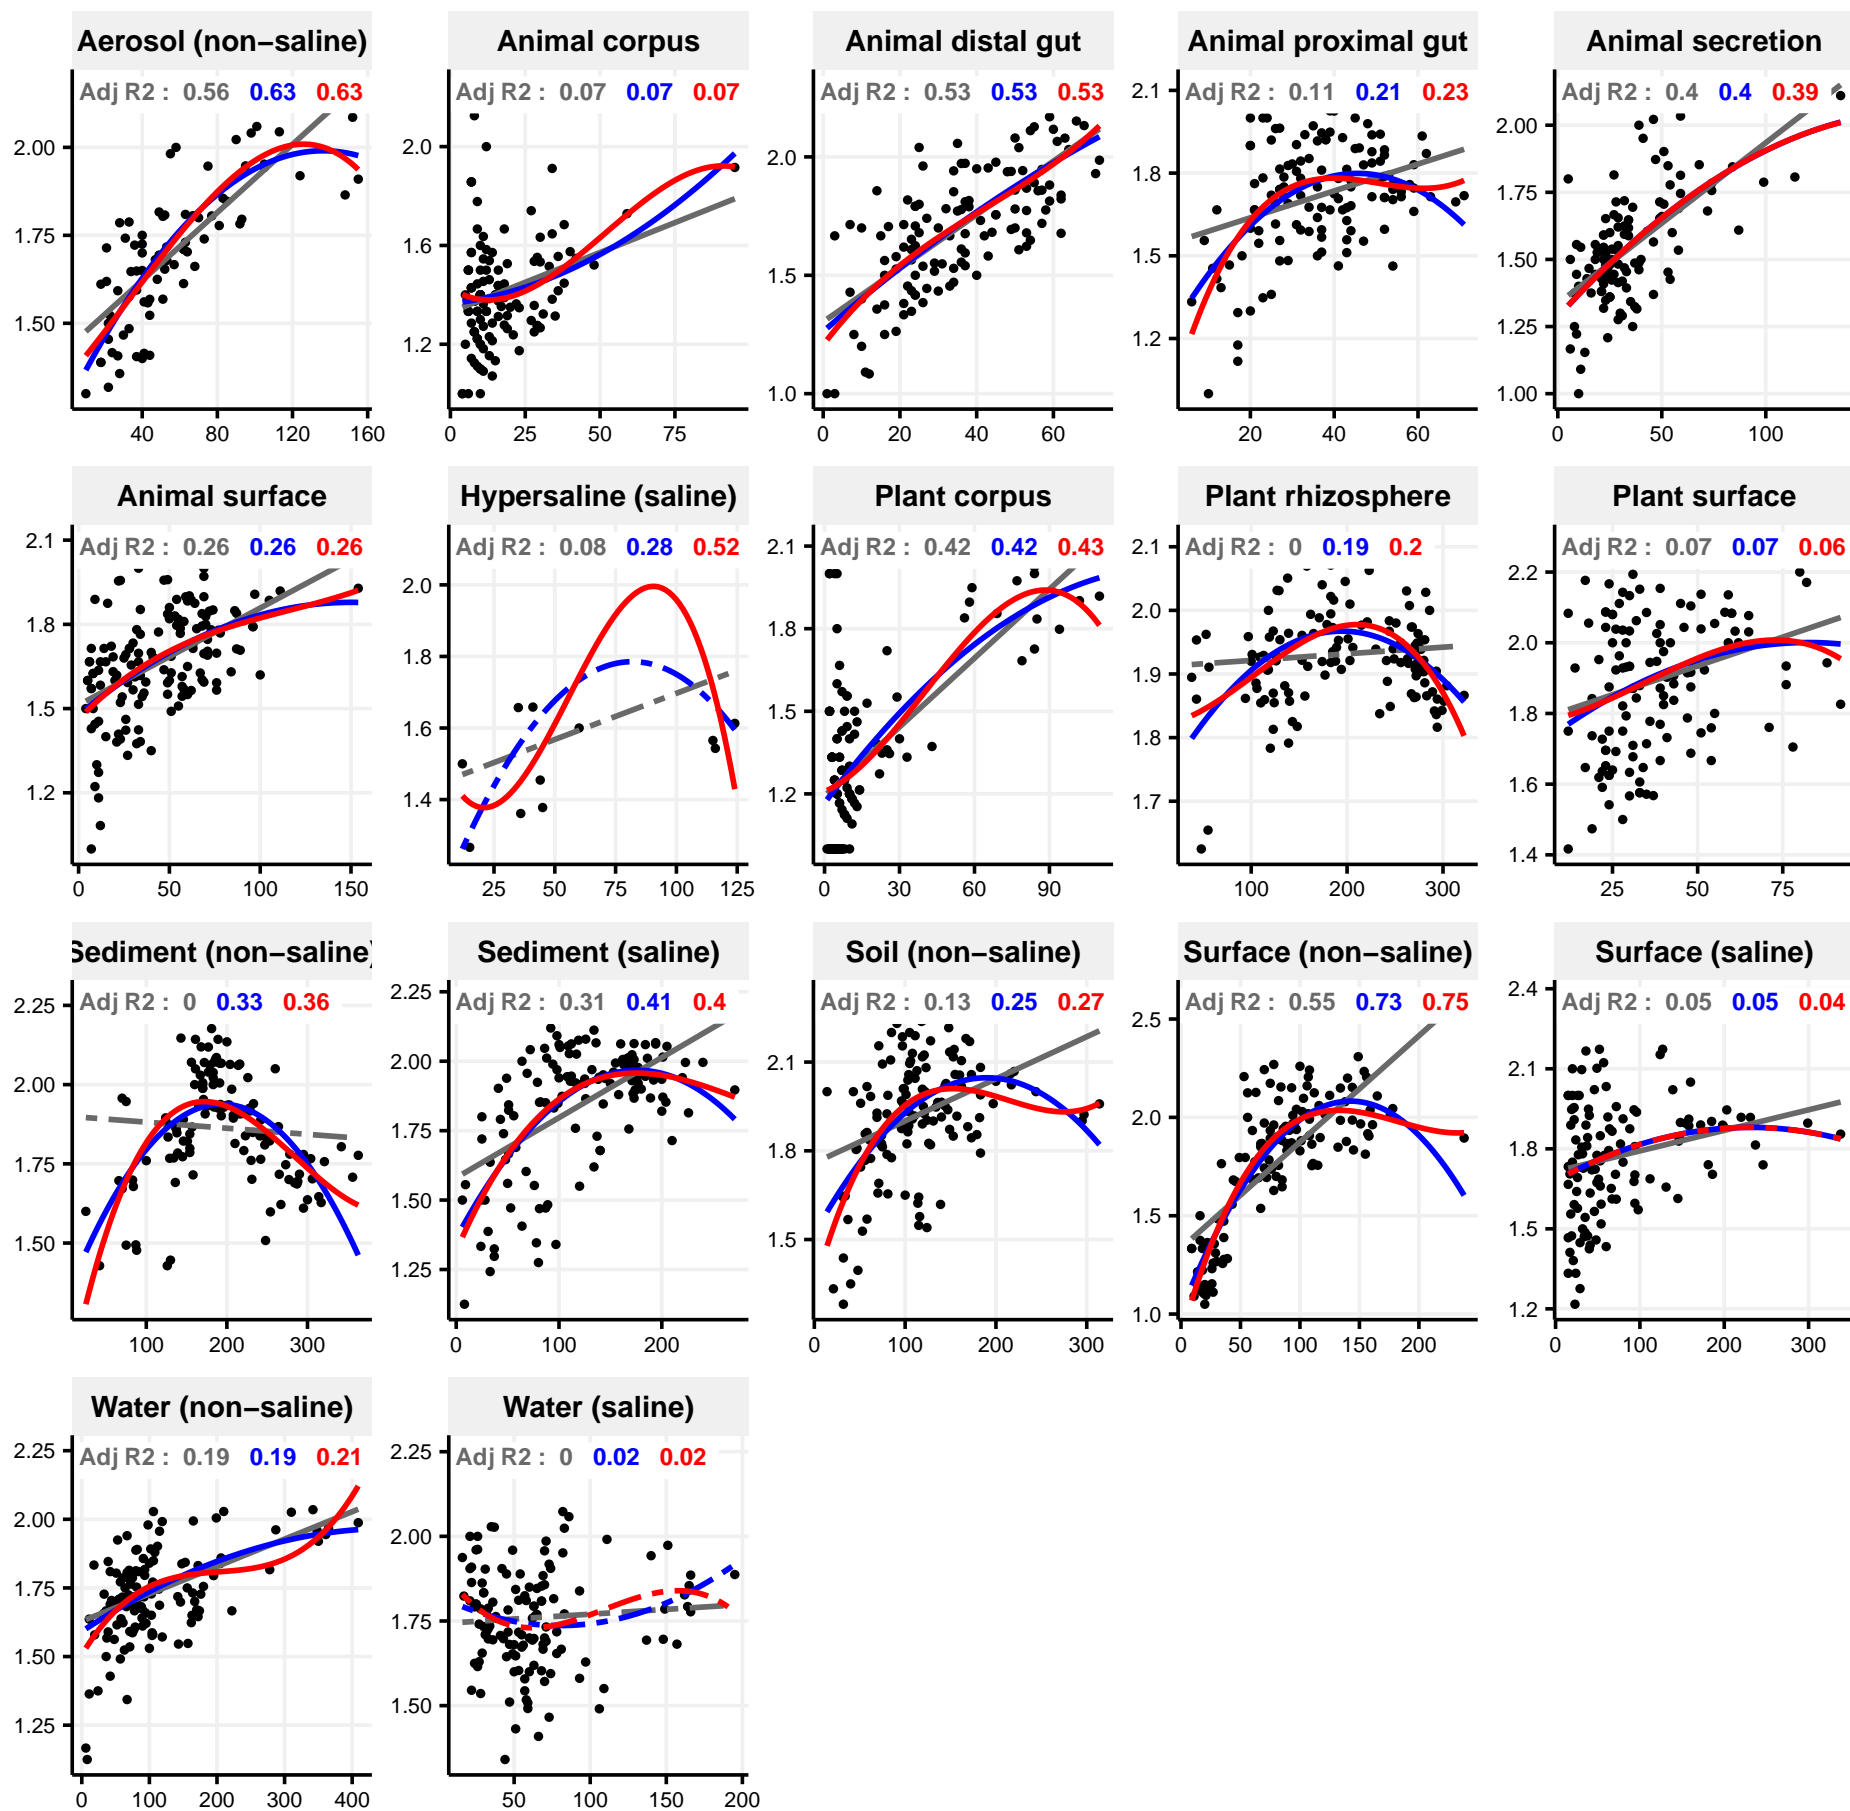

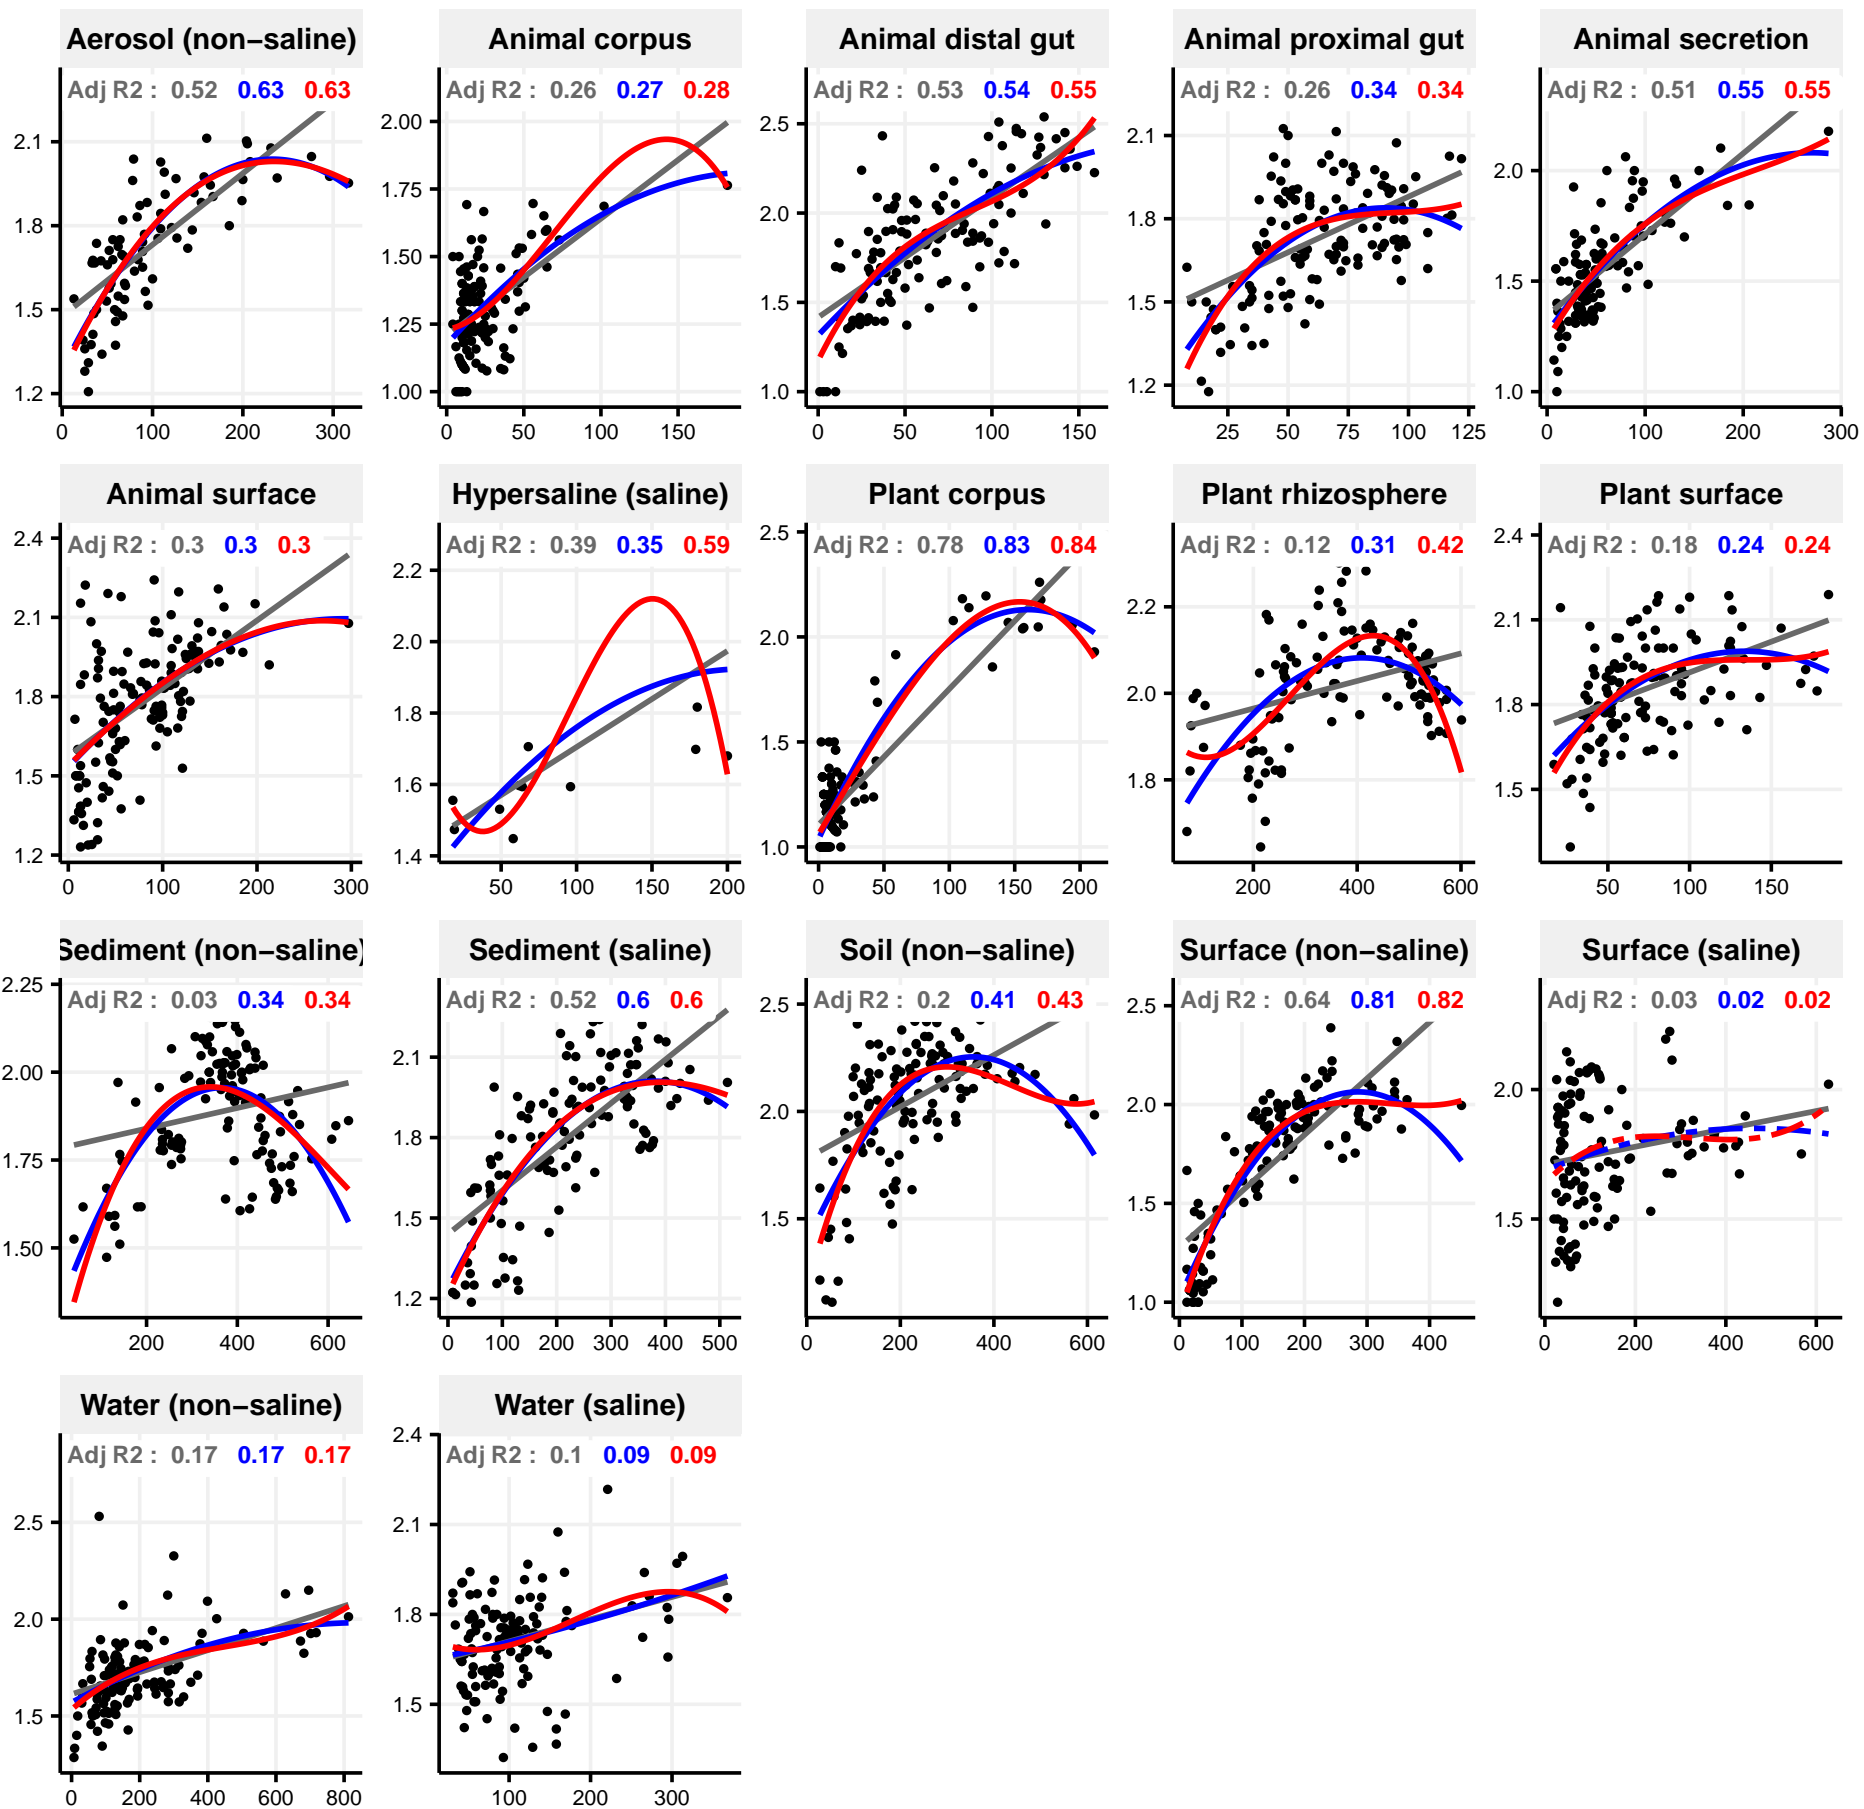

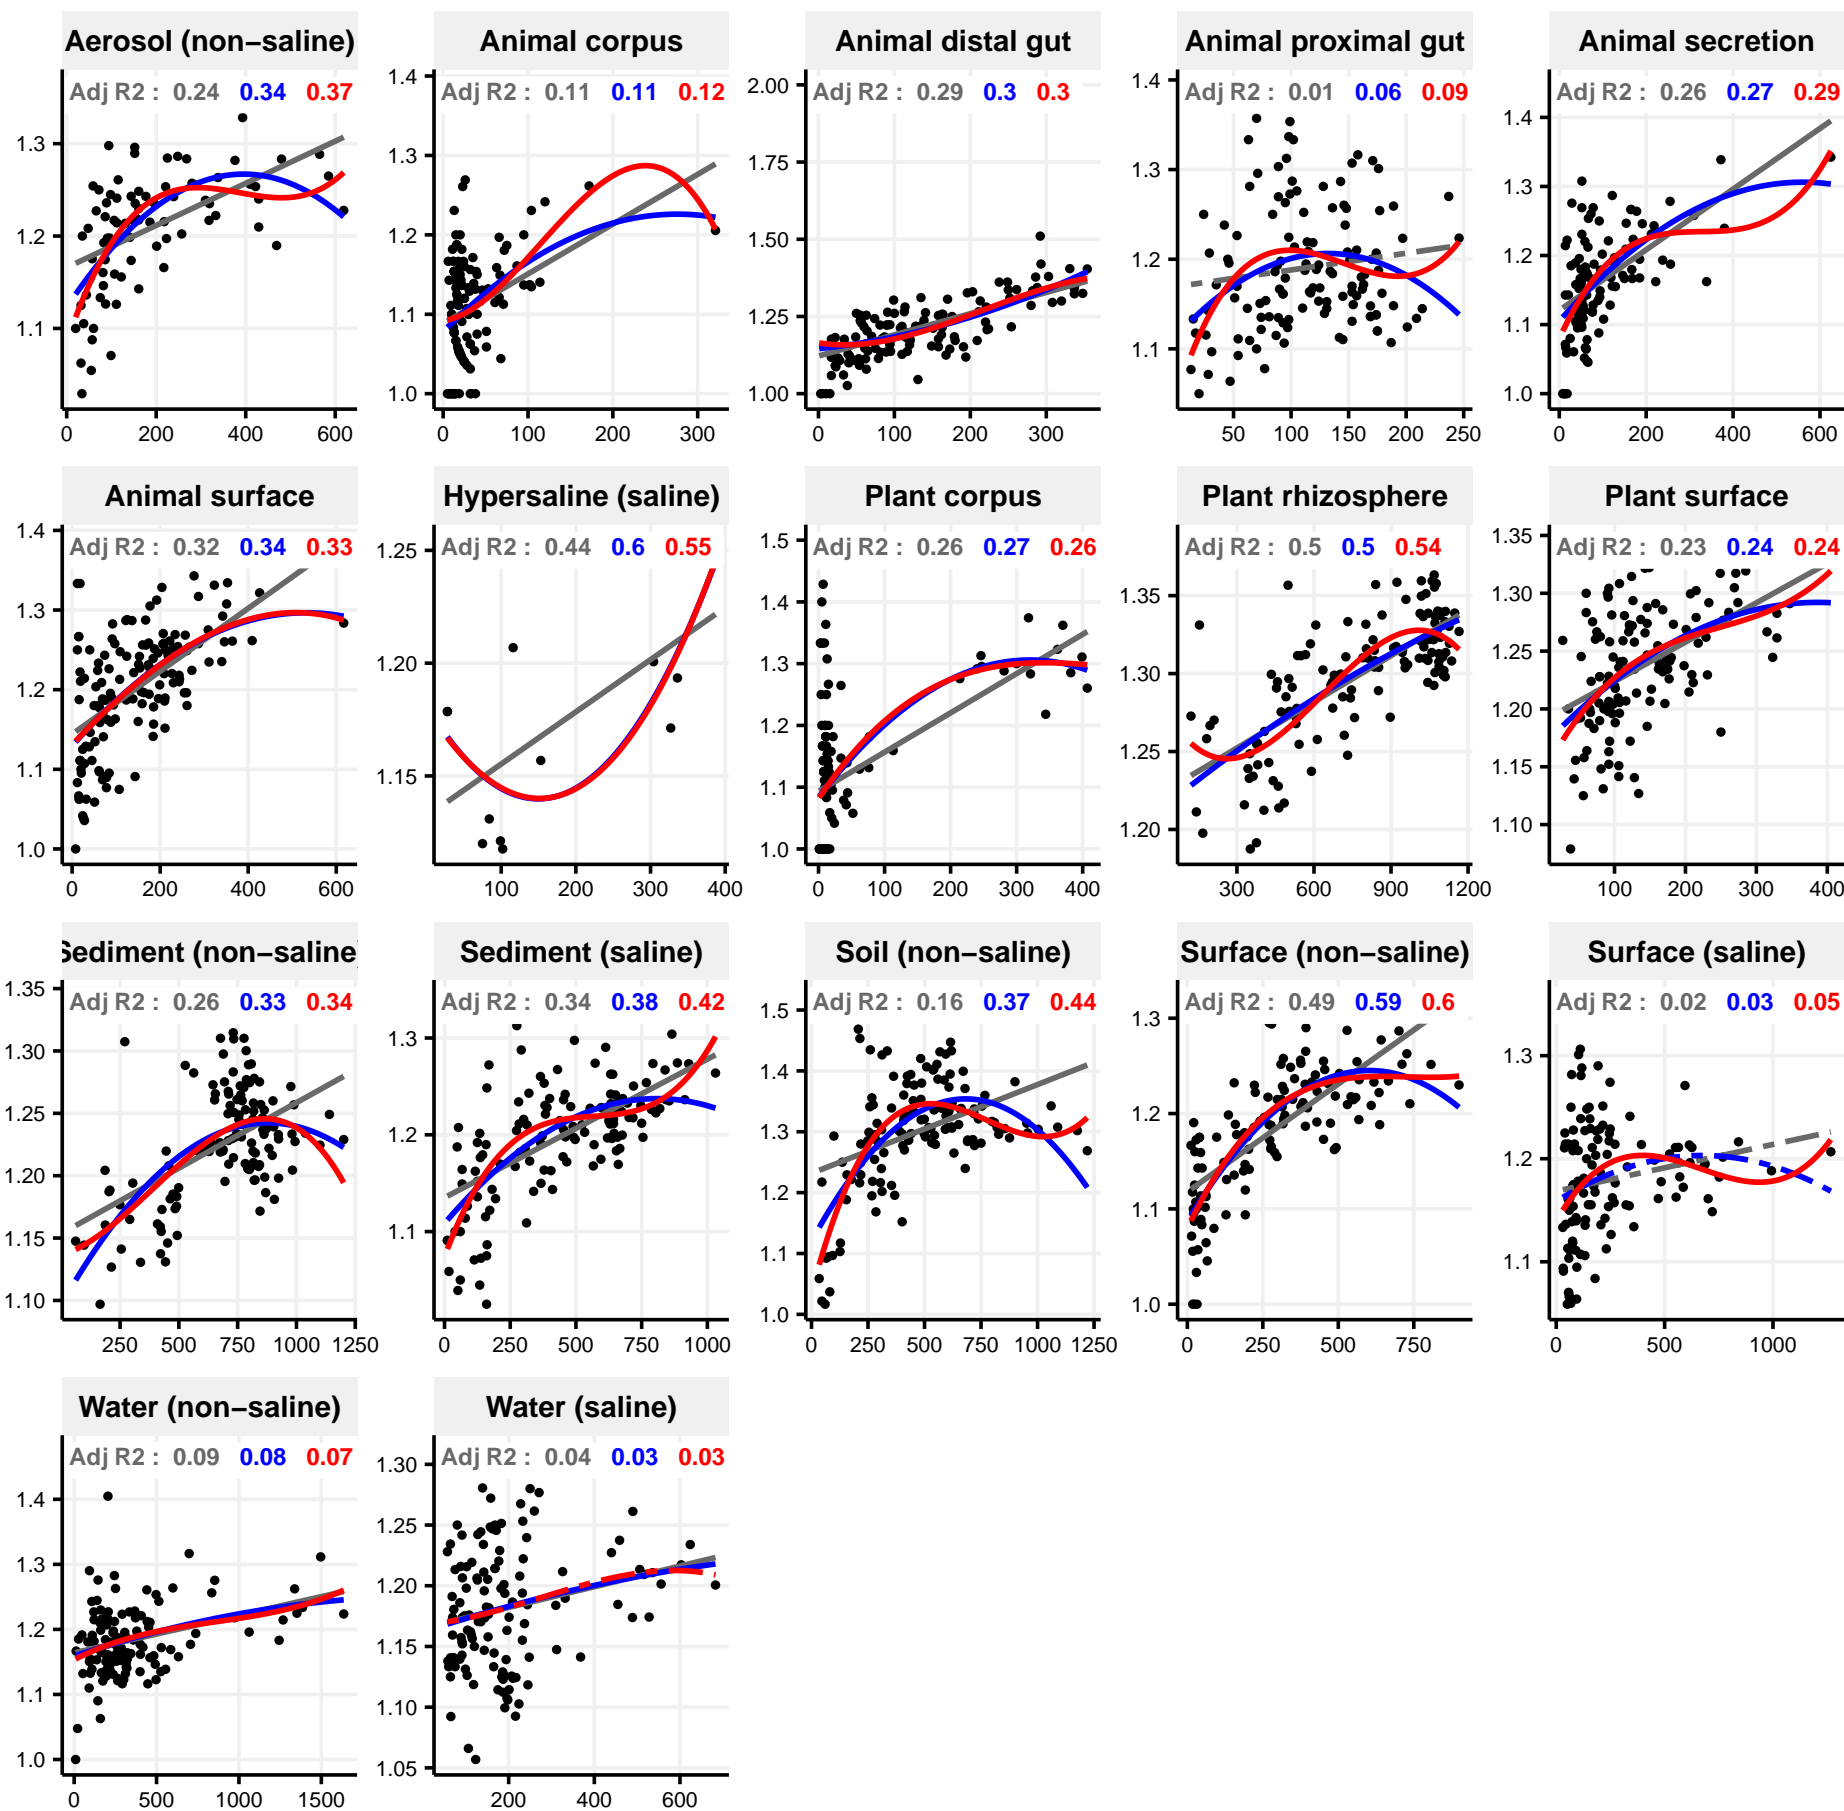

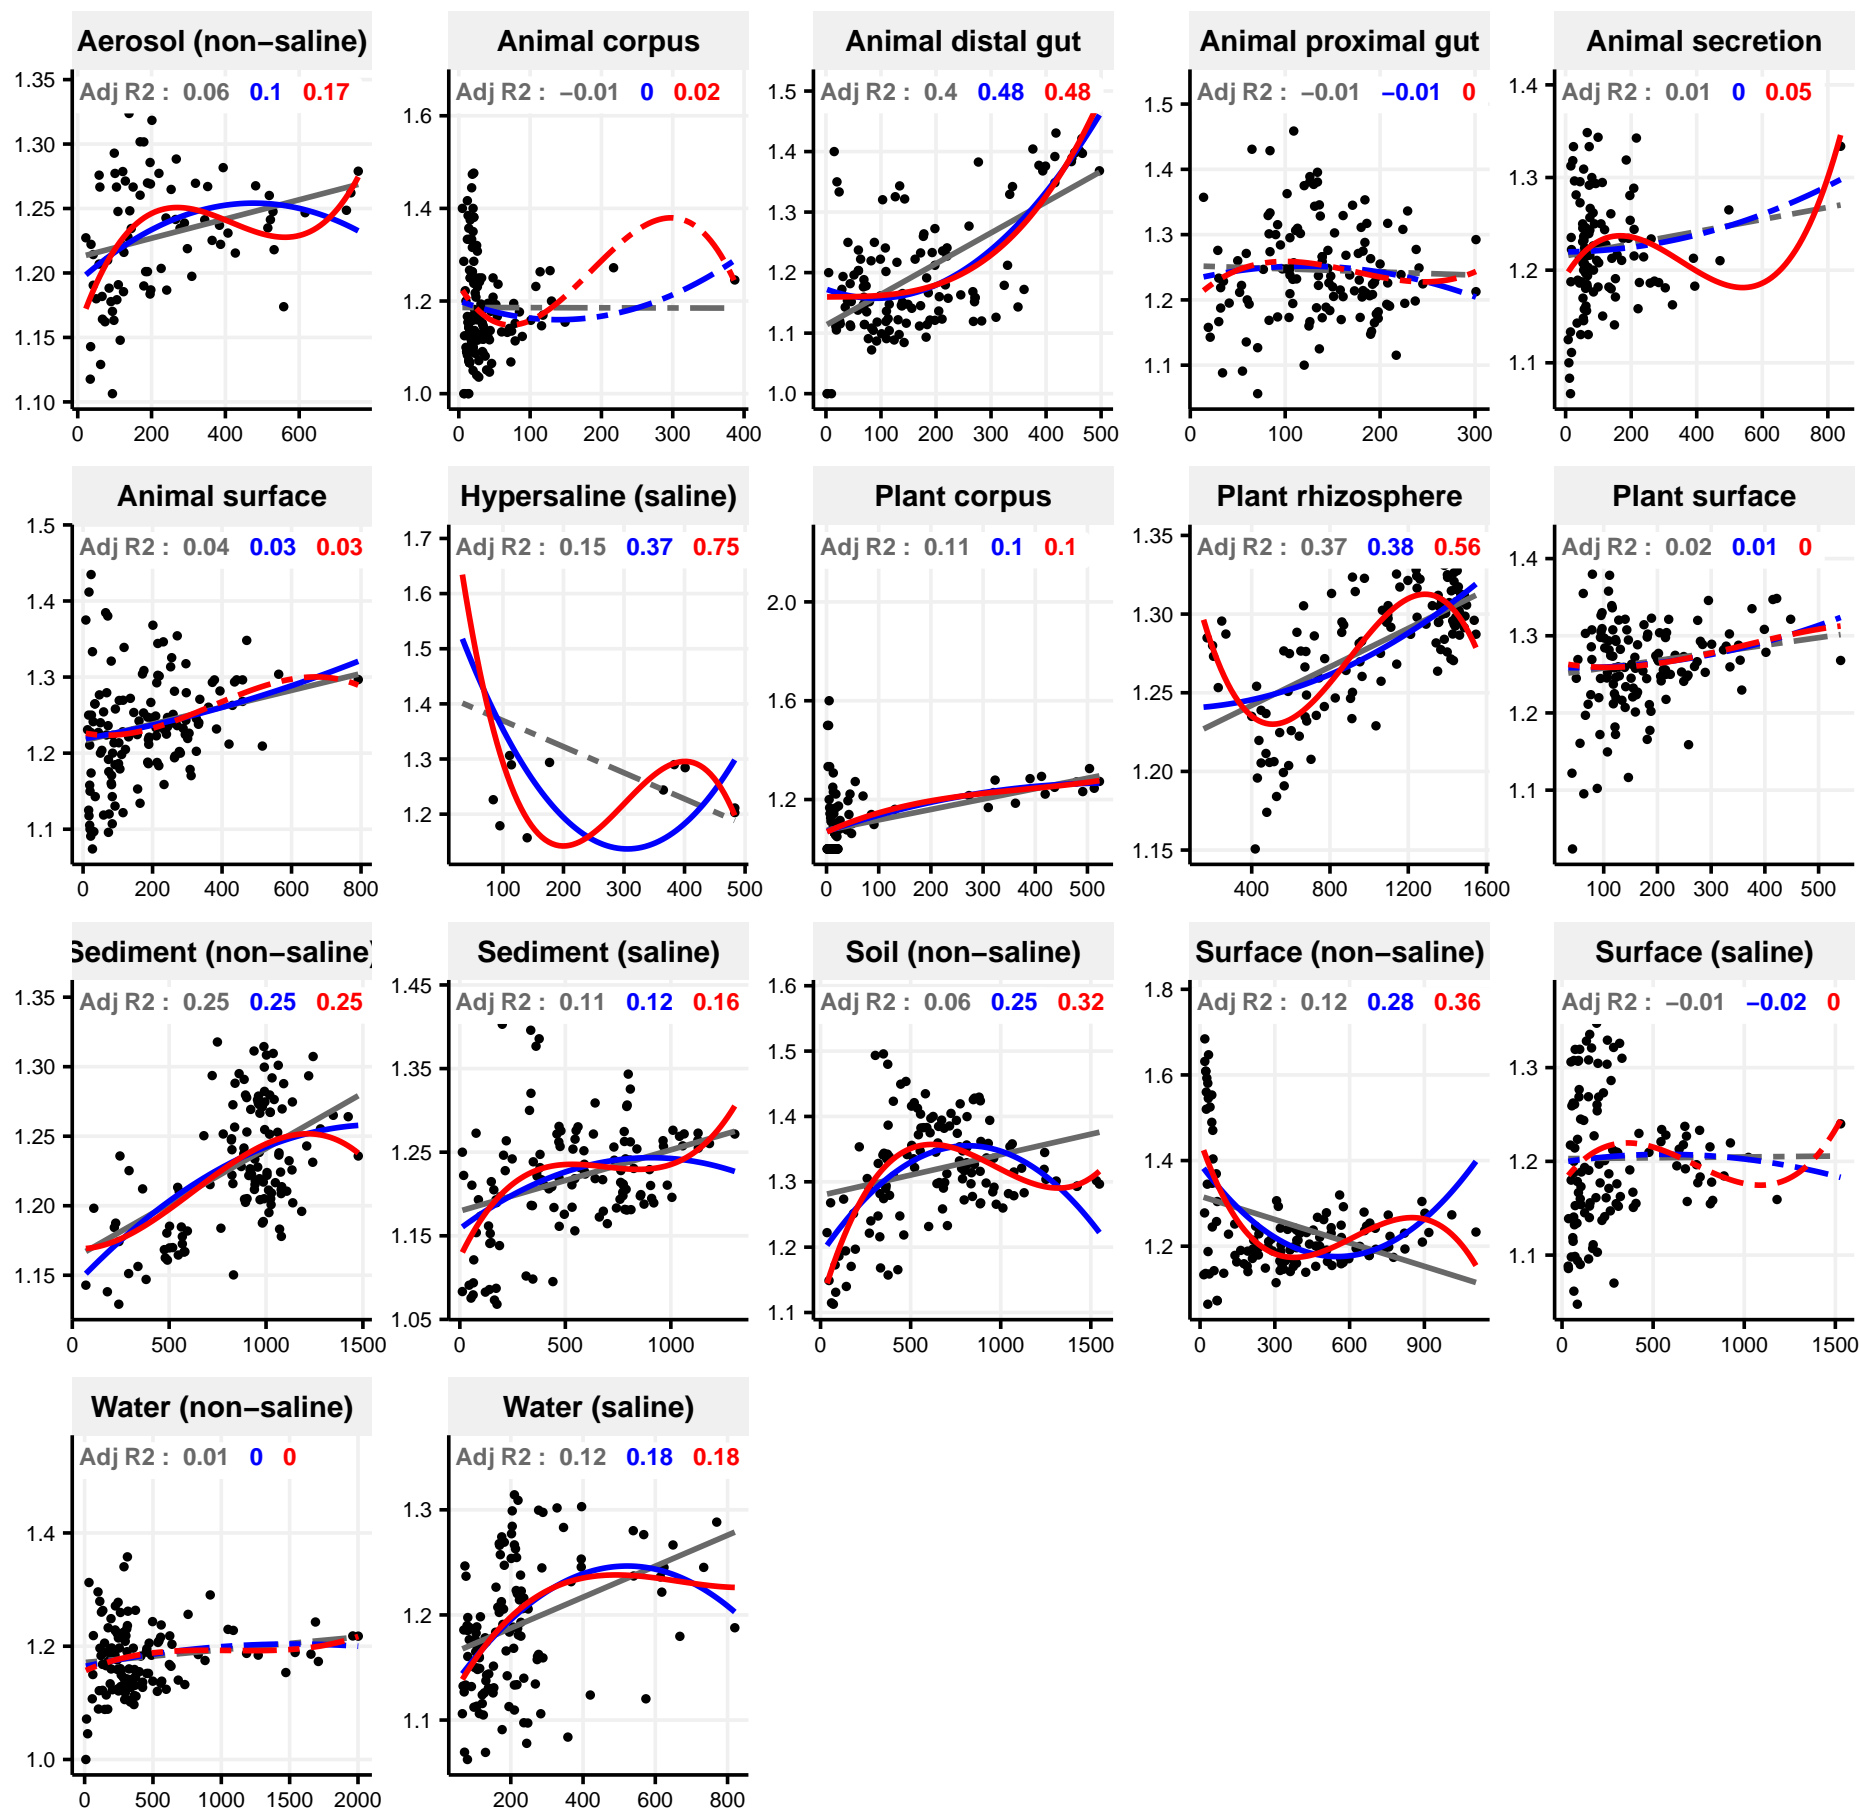

Supplement: supp [file elife-58999-supp-v1.zip › elife_poa_e58999_Figure_2_figure_supplement_11.pdf]

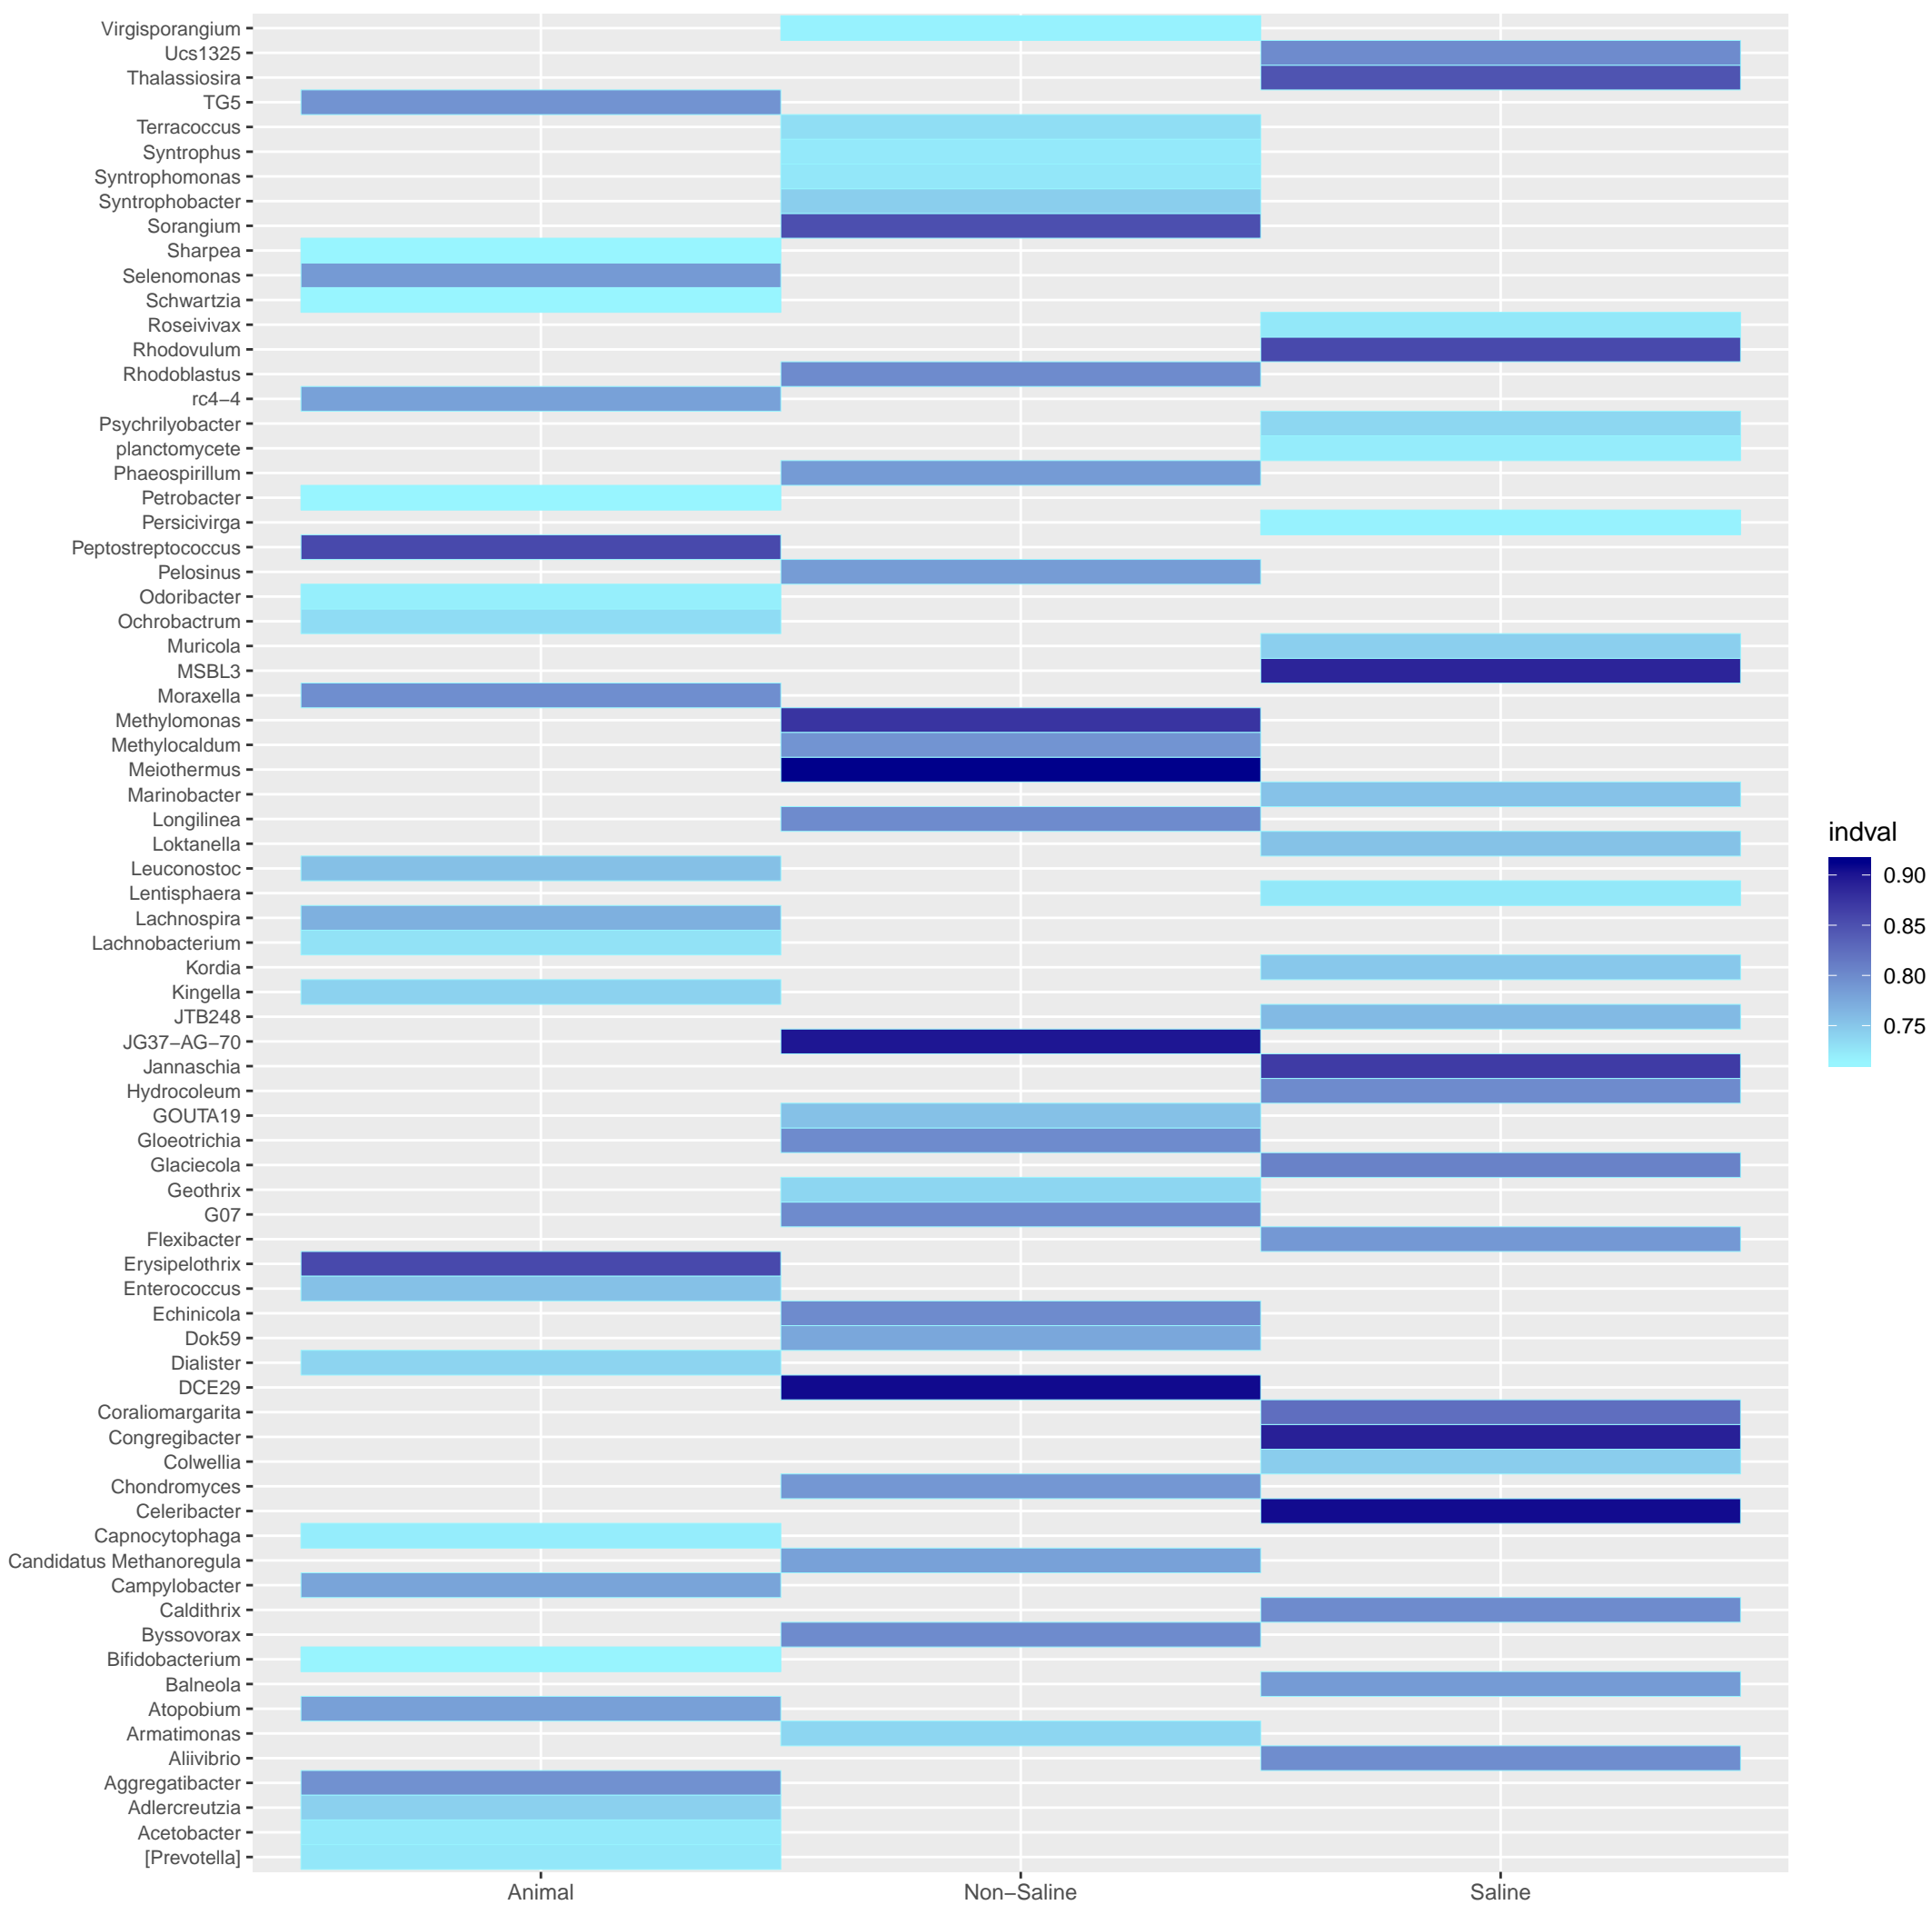

Supplement: supp [file elife-58999-supp-v1.zip › elife_poa_e58999_Figure_4_figure_supplement_1.pdf]
